# Neural manifolds in V1 change with top-down signals from V4 targeting the foveal region

Aitor Morales-Gregorio<sup>1,2\*</sup>, Anno C. Kurth<sup>1,3</sup>, Junji Ito<sup>1</sup>, Alexander Kleinjohann<sup>1,4</sup>, Frédéric V. Barthélemy<sup>1,5</sup>, Thomas Brochier<sup>5</sup>, Sonja Grün<sup>1,4</sup>, Sacha J. van Albada<sup>1,2</sup>

<sup>1</sup>Institute of Neuroscience and Medicine (INM-6) and Institute for Advanced Simulation (IAS-6) and JARA-Institut Brain Structure-Function Relationships (INM-10), Jülich Research Centre, Jülich, Germany.

<sup>2</sup>Institute of Zoology, University of Cologne, Cologne, Germany. <sup>3</sup>RWTH Aachen University, Aachen, Germany.

<sup>4</sup>Theoretical Systems Neurobiology, RWTH Aachen University, Aachen, Germany. <sup>5</sup>Institut de Neurosciences de la Timone (INT), CNRS & Aix-Marseille Université, Marseille, France.

\*Corresponding author: [a.morales-gregorio@fz-juelich.com](mailto:a.morales-gregorio@fz-juelich.com)

January 12, 2024

High-dimensional brain activity is often organised into lower-dimensional neural manifolds. However, the neural manifolds of the visual cortex remain understudied. Here, we study large-scale multielectrode electrophysiological recordings of macaque (*Macaca mulatta*) areas V1, V4 and DP with a high spatio-temporal resolution. We find, for the first time, that the population activity of V1 contains two separate neural manifolds, which correlate strongly with eye closure (eyes open/closed) and have distinct dimensionalities. Moreover, we find strong top-down signals from V4 to V1, particularly to the foveal region of V1, which are significantly stronger during the eyes-open periods, a previously unknown effect. Finally, *in silico* simulations of a balanced spiking neuron network qualitatively reproduce the experimental findings. Taken together, our analyses and simulations suggest that top-down signals modulate the population activity of V1, causing two distinct neural manifolds. We postulate that the top-down modulation during the eyes-open periods prepares V1 for fast and efficient visual responses, resulting in a type of visual stand-by state.

Keywords: Neural manifold, dimensionality, electrophysiology, macaque, visual cortex, top-down signals, resting state

## Introduction

1 The brain can be described as a high-dimensional dynamical system capable of representing and  
2 processing a plethora of low-dimensional variables.

3 The time-resolved activity of a population of neurons can be considered as a trajectory in a high-  
4 dimensional space, where each neuron represents one dimension; i.e., the state space of the neural  
5 system. Typically, the system does not attain all possible states in the state space, but rather remains  
6 confined to small subsets. These subsets of the state space are referred to as a neural manifolds<sup>1–5</sup>.  
7 Neural manifolds have been shown to encode aspects such as decision-making in the prefrontal cortex  
8 of macaque<sup>6</sup>, hand movement trajectories in the motor cortex of macaque<sup>2,3,7</sup>, odour in the piriform  
9 cortex of mice<sup>8</sup>, head direction in the anterodorsal thalamic nucleus of mice<sup>5</sup>, and spatial position in  
10 the hippocampus of mice<sup>9</sup>. The study of neural manifolds in the visual cortex has been conducted in  
11 mice<sup>10,11</sup> and macaque<sup>12,13</sup>. However, to the best of our knowledge, the state dependence of neural  
12 manifolds in the primary visual cortex (V1) of macaque has not yet been investigated.

13 Neural manifolds often have an intricate structure, which can be studied using methods borrowed  
14 from computational topology<sup>5,12,14</sup>. In addition to the topology, the number of uncorrelated covariates  
15 required to capture the variance in the state space is studied as a measure of the dimensionality of a  
16 neural system<sup>1,10,15–20</sup>. Regardless of species and brain area, the dimensionality is drastically lower  
17 than the total number of recorded neurons (i.e., state-space dimension)<sup>1</sup>, suggesting robust encoding of  
18 low-dimensional variables. Stringer et al.<sup>10</sup> showed that the dimensionality of visual cortical activity in  
19 mice can vary dynamically to encode precise visual input, seen as changes in the power law exponent of  
20 the explained variance. Such dynamical changes in dimensionality have not yet been demonstrated in  
21 other species.

22 Whether a subject has its eyes open or closed is known to affect the activity in the visual cortex,  
23 even in darkness<sup>21–25</sup>. In particular, the spectral power in the alpha frequency band (roughly 8–12 Hz)  
24 is known to decrease when the eyes are open, commonly known as alpha blocking<sup>26–28</sup>. Alpha blocking  
25 is usually attributed to desynchronisation<sup>27</sup> or oscillatory damping<sup>28</sup> within V1. However, the concrete  
26 pathway(s) triggering these phenomena, and the relation between eye closure and neural manifolds in  
27 V1, are still unknown.

28 The primary visual cortex (V1) is known to represent fine details of visual input at both single-  
29 neuron and population levels<sup>12,29</sup>. The visual system is hierarchical in nature, with information  
30 travelling from lower to higher areas (bottom-up) and vice versa (top-down), within specific frequency  
31 bands<sup>30–33</sup>. Top-down signals from V4 to V1 are known to mediate visual attention for figure-ground  
32 segregation and contour integration in macaque<sup>33–37</sup>. Recent evidence suggests that top-down signals  
33 can modulate neural manifold geometry and their dimensionality<sup>38,39</sup>. Naumann et al.<sup>38</sup> show *in*  
34 *silico* that top-down signals can rotate neural manifolds to maintain context-invariant representations.  
35 Dahmen et al.<sup>39</sup> show that recurrent connectivity motifs modulate the dimensionality of the cortical  
36 activity. As effective connectivity is input-dependent<sup>40</sup>, a change in top-down input may therefore affect  
37 the dimensionality of neural activity. However, whether top-down signals modulate neural manifold  
38 geometry and dimensionality *in vivo* remains to be shown.

39 Here, we study the state space of the primary visual cortex of the macaque (N=3) during the resting  
40 state and its relation to the top-down signals from higher visual areas (V4, DP). We find that the  
41 population activity of macaque V1 is organised as two distinct high-dimensional neural manifolds, which  
42 are correlated with the behaviour (eye closure) of the macaques, but not related to any visual stimuli.  
43 The dimensionality of each of these manifolds is significantly different, with higher dimensionality found  
44 during the eyes-open periods than the eyes-closed periods. In addition, we estimated input from higher  
45 cortical areas to V1 and found that these top-down signals (in the form of LFP beta-band spectral  
46 Granger causality) are significantly stronger during the eyes-open periods, suggesting they play a role  
47 in modulating the neural manifolds and their dimensionality. Finally, we simulate a spiking neuron  
48 model under resting-state conditions and show that top-down signals can induce multiple manifolds by  
49 changing the firing modes of the network. Taken together, the data analysis and simulations show that  
50 top-down signals could actively modulate the V1 population activity, leading to two distinct neural  
51 manifolds of macaque visual cortical activity.

## Results

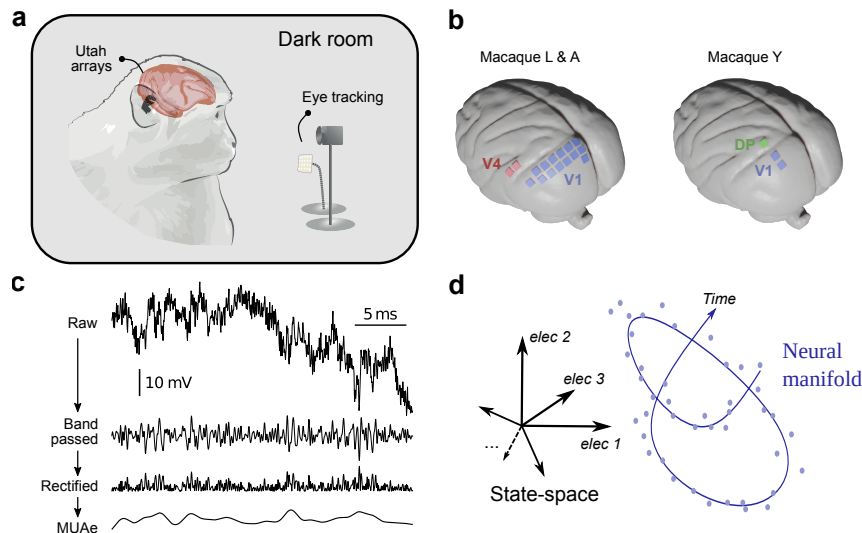

Figure 1: Overview of the experiment and neural manifold construction. **a** Illustration of the experimental setup. **b** Approximate locations of array implants in both experiments. Exact placement of the arrays differs slightly between subjects L and A. **c** Steps for obtaining the multi-unit activity envelope (MUAe)<sup>41</sup>, used in this study. Band-pass filtering is performed between 500 Hz and 9 kHz, and the rectified signal is low-passed at 200 Hz to obtain the MUAe. **d** Schematic representation of state space and a neural manifold. Note that time is implicit within the neural manifold.

52 To explore the activity in the visual cortex, the intracortical electrical potential from the visual cortex  
53 of three rhesus macaques (*Macaca mulatta*) was recorded. The experiments simultaneously recorded the  
54 activity from V1 and V4 (macaques L & A)<sup>42</sup> and from V1 and DP (macaque Y, see Figure 1b)<sup>43</sup>. The  
55 recordings were made in the resting state, i.e., the macaques sat head-fixed in a dark room and were not  
56 instructed to perform any particular task. In this state the macaques often showed signs of sleepiness  
57 and kept their eyes closed for periods of variable duration. The right eye—contralateral to the site of  
58 neural recording—was tracked using an infrared camera, allowing the identification of periods of open  
59 or closed eyes. See methods [Electrophysiological data from macaques L & A](#) and [Electrophysiological](#)  
60 [data from macaque Y](#) for further details on the data acquisition and processing. The experimental  
61 setup and data processing steps are illustrated in Figure 1.

### Two distinct neural manifolds in V1 correlated with eye closure

62 To explore the activity of the visual cortex, we characterise the high-dimensional population activity  
63 (between 40 and 800 electrodes, see Table 1 for details) for each area and macaque in terms of the  
64 downsampled (1 Hz) multi-unit activity envelope (MUAe)<sup>41</sup> (Figure 2a). We projected the population  
65 activity into a 3D space for visualisation using principal component analysis (PCA) (Figure 2b-d).

66 In V1, at least two distinct neural manifolds are apparent in the 3D projection space; sample session  
67 in Figure 2b-d, see Figure S1-S6 for all other sessions and subjects. We labelled the manifolds according  
68 to the sign of the log odds of a two-component Gaussian mixture model (see methods [Neural manifolds](#)  
69 [and clustering](#) and [Outlier removal](#)). The log odds represent the probability for a given data point to  
70 correspond to one manifold or the other.

71 To confirm that the two manifolds in the lower-dimensional projection are not an artefact of the  
72 dimensionality reduction, we estimated the Betti numbers of the high-dimensional population activity  
73 using persistent homology (see Methods, [Topological data analysis](#)). The persistence barcodes show  
74 that at least two independent generators of the  $H_0$  homology groups exist in the high-dimensional  
75 population activity, corresponding to two connected components (Figure S7), i.e., two distinct neural  
76 manifolds. Thus, we confirm that the two manifolds observed in the 3D projection are inherent to the  
77 high-dimensional space.

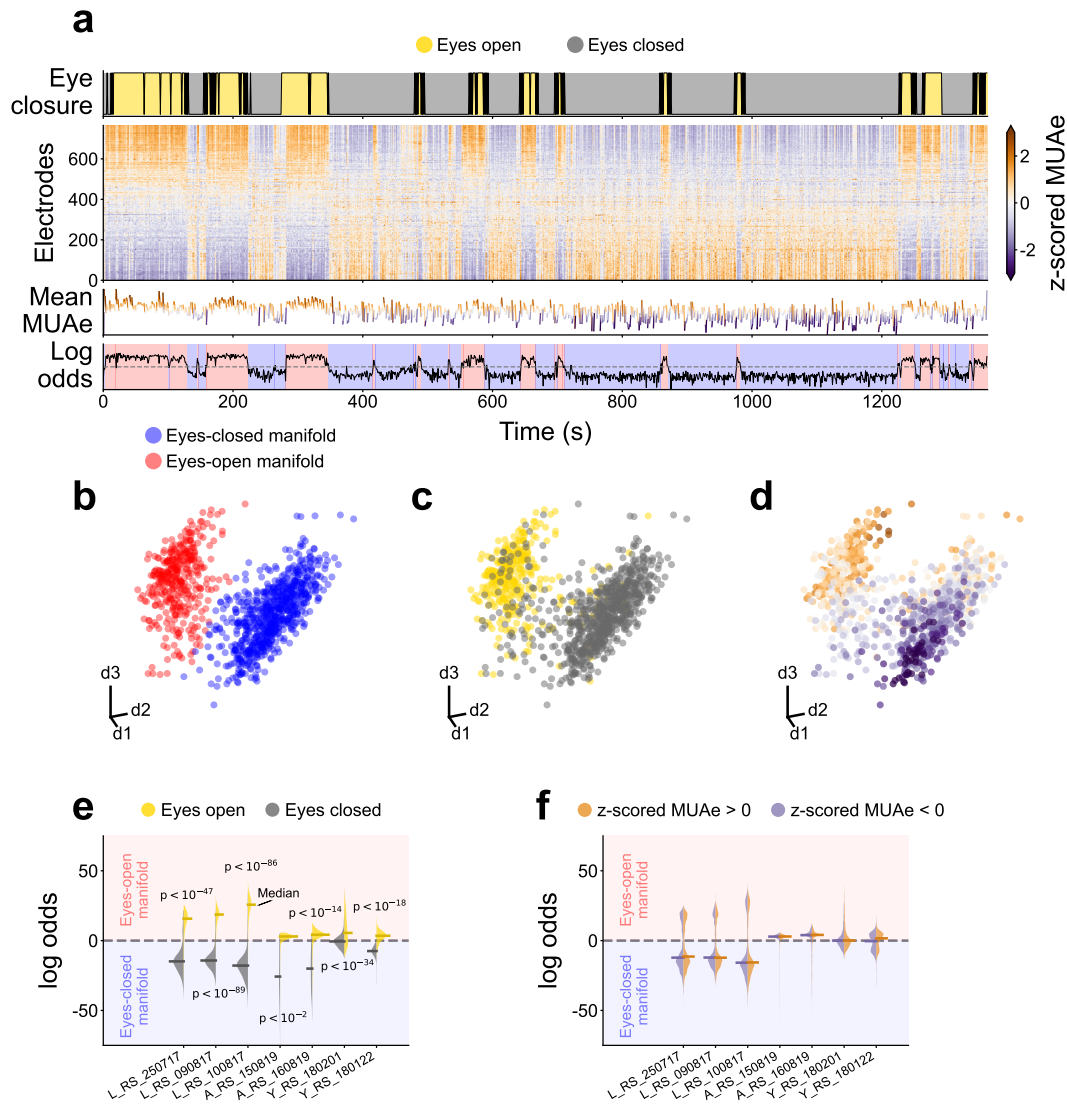

Figure 2: Two distinct neural manifolds in V1 correlated with eye closure. **a** Overview of the experimental data from session L\_RS\_250717. From top to bottom: Time evolution of the eye signal; the z-scored MUAe signal for each electrode (electrodes ordered by their correlation with the eye signal); the mean z-scored MUAe at each time point; and the log odds overlaid with the most likely manifold (two clusters, Gaussian mixture model). **b**, **c**, **d** First three principal components of the MUAe population activity. Colours indicate the manifold identified via the log odds of a Gaussian mixture (**b**), the eye closure (**c**) and the mean z-scored MUAe (**d**). Each dot represents a different point in time. Outliers were excluded from the neural manifolds shown in **b–d**, see [Outlier removal](#). **e**, **f** Violin plots of the distribution of the log odds across epochs, respectively distinguished according to eye closure (**e**, result of a logistic regression test shown) and z-scored MUAe (**f**). Horizontal bars indicate medians of the distributions.

78 Additionally, we tested whether the observed manifolds could be an artefact of the MUAe signal.  
 79 We spike-sorted one session (L\_RS\_250717) with a semi-automatic method and analysed the population  
 80 activity resulting from the single-neuron firing rates ([Figure S8](#)). The spiking activity also displayed  
 81 two manifolds, in agreement with the MUAe signals.

82 While the activity of visual cortex is mainly driven by visual input, whether and to what extent  
 83 it is separately modulated by eye closure is unclear. Marking data points on the V1 manifolds with  
 84 the eye closure signal ([Figure 2b](#)) reveals that one manifold strongly relates to the eyes-open periods,  
 85 whereas the other manifold strongly relates to the eyes-closed periods.

86 To confirm the correlation between eye closure and manifolds, we tested the differences between the  
 87 eyes-open and eyes-closed periods using a twofold approach. First, we performed a logistic regression

88 between the eye closure signal and the log odds, revealing a significantly higher than chance correlation  
89 in all sessions (Figure 2e). Second, we visualised the distribution of the log odds during the eyes-open  
90 and eyes-closed periods separately; showing a clear correspondence between the eye closure and the  
91 sign of the log odds in most cases (Figure 2e). Taken together, the logistic regression and the log-odds  
92 distributions demonstrate that membership of a point in state space in one of the two V1 manifolds is  
93 closely related to eye closure. Given this, we will refer to the manifolds as the eyes-open manifold or  
94 the eyes-closed manifold.

95 The existence of two separate manifolds could be trivially explained if the MUAe activity levels  
96 were significantly higher in one manifold, and the manifolds simply reflected the population activity  
97 level. To rule out this possibility, we checked whether higher-activity epochs uniquely correspond to  
98 one of the manifolds. The violin plots of the full data distribution—based on the z-scored MUAe shown  
99 in Figure 2a—show that there is no clear separation into two manifolds (Figure 2f). Additionally, we  
100 visualised the 2D histograms of z-scored MUAe against log odds (Figure S9). Both the violin plots and  
101 the 2D histograms suggest that the activity level alone does not fully explain the presence of the two  
102 neural manifolds in macaque V1.

103 For completeness, we also visualised the population activity from V4 and DP (Figure S10, S11). In  
104 contrast to V1, the population activity in areas V4 and DP does not appear to contain two distinct  
105 neural manifolds. We also tested the relationship between neural activity and eye closure in V4 and  
106 DP (Figure S12), using the same procedure as for V1. Although some correlation is observed between  
107 eye closure and log odds, the violins reveal no clear manifold separation. Thus, we conclude that the  
108 observed manifolds are restricted to V1 and are not present in V4 or DP.

### Higher dimensionality during eyes-open periods, primarily due to decorrelation

109 To further understand the functional role and implications of the observed neural manifolds in V1, we  
110 studied their dimensionality. We used the participation ratio (PR, Equation 1), which is defined via the  
111 percentage of variance explained by the principal components of the covariance matrix<sup>19,39</sup>. The PR  
112 can be rewritten in terms of the statistics of the covariance matrix

$$\text{PR} = \frac{(\sum_i \lambda_i)^2}{\sum_i \lambda_i^2} = \frac{N}{1 + v^2 + (N - 1)(m^2 + s^2)} \quad (1)$$

113 where  $\lambda_i$  are the eigenvalues of the covariance matrix and  $N$  is the number of electrodes.  $v$ ,  $m$ , and  $s$   
114 are the ratios between the standard deviation of auto-covariances, average cross-covariances, and the  
115 standard deviation of cross-covariances with respect to the average auto-covariances, respectively. See  
116 Dimensionality for detailed methods.

117 To study the dimensionality, we computed the time-varying PR from the z-scored MUAe signals, by  
118 calculating the PR for windows of 30 s width (1 s steps, thus 29 s of overlap with adjacent windows),  
119 see Figure 3a. Stronger MUAe activity is typically associated with higher variance, which may bias the  
120 results toward higher dimensionality. We avoided bias due to the varying activity level by normalising  
121 the data (via z-scoring) within each window. We found that there is a strong correlation between the  
122 log odds and the time-varying PR (Figure 3b) and compared the PR values between the two manifolds  
123 using a Mann-Whitney U test (Figure 3c). We also measured the PR for one spike sorted session  
124 (Figure S8d). The correlation and tests show that the dimensionality is higher during the eyes-open  
125 periods, consistently for all datasets, both for MUAe and spikes.

126 To further support this finding, we also show the distribution of the variance explained by each of  
127 the principal components (PC) of the MUAe data, depicted on a log-log scale in Figure 3d. We fitted a  
128 power law to the PC variances and report the exponent  $\alpha$  (Figure 3e). A higher  $\alpha$  indicates faster decay  
129 of the curve, i.e., lower dimensionality. The power law exponents are in agreement with our sliding  
130 window approach: We observe higher dimensionality during eyes-open than during eyes-closed periods  
131 (Figure 3e).

132 To narrow down the reason causing the dimensionality changes, we computed  $v^2$ ,  $(N - 1)m^2$ , and  
133  $(N - 1)s^2$  and observed that the changes in  $(N - 1)m^2$ —i.e. the average cross-covariances—dominate

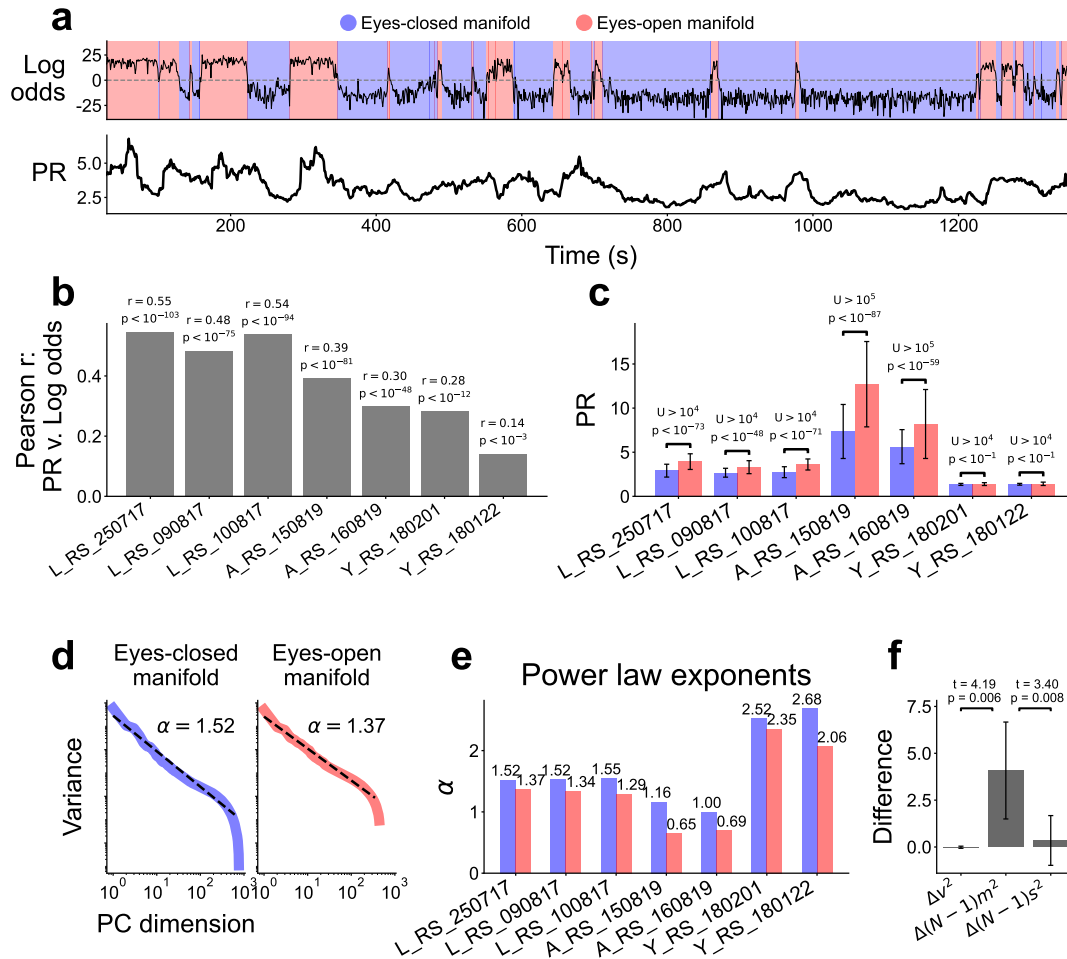

Figure 3: Higher dimensionality during eyes-open periods. **a** Log odds and participation ratio (PR) for session L\_RS\_250717. The PR was calculated on a sliding window of 30 s width. **b** Pearson correlation between log odds and PR for each session. **c** Comparison of PR between neural manifolds (Mann-Whitney U test). **d** Distribution of principal components and their explained variance on a log-log scale, for each manifold. Power law exponent  $\alpha$  estimated over the ranges where the curves approximate a power law. **e** Comparison of power law exponents for the two neural manifolds in all sessions. The eyes-open manifold always had a smaller exponent, indicating a higher dimensionality. **f** Differences in the terms of the PR function between eyes-open and eyes-closed, results of Welch's t-test across sessions shown. The quantities are related to the standard deviation of auto-covariances ( $v^2$ ), average cross-covariances ( $(N-1)m^2$ ), and standard deviation of cross-covariances ( $(N-1)s^2$ )

134 the PR differences between the eyes-open and eyes-closed periods (Figure 3f). Thus, the main reason  
 135 for the observed dimensionality changes is decorrelation during the eyes-open periods.

## Top-down signals from V4 to V1 are present in the form of beta-band spectral Granger causality

136 In search of an internal mechanism that may modulate the neural manifolds and their dimensionality,  
 137 we turned our attention to cortico-cortical interactions. Since signatures of top-down activity have  
 138 previously been reported in the beta frequency band (roughly 12–30 Hz)<sup>31,33,45</sup>, we use spectral Granger  
 139 causality to measure top-down signals.

140 To determine whether top-down signals are present in our data, we calculated the coherence and  
 141 Granger causality between every pair of V1-V4 and V1-DP electrodes (see Coherence and Granger  
 142 causality)—using the local field potential (LFP). Figure 4a,b show the coherence and Granger causalities  
 143 for a sample pair of electrodes. To quantify the cortico-cortical signals, we searched for peaks in  
 144 the coherence and Granger causality, using an automatic method (see Methods, Peak detection).

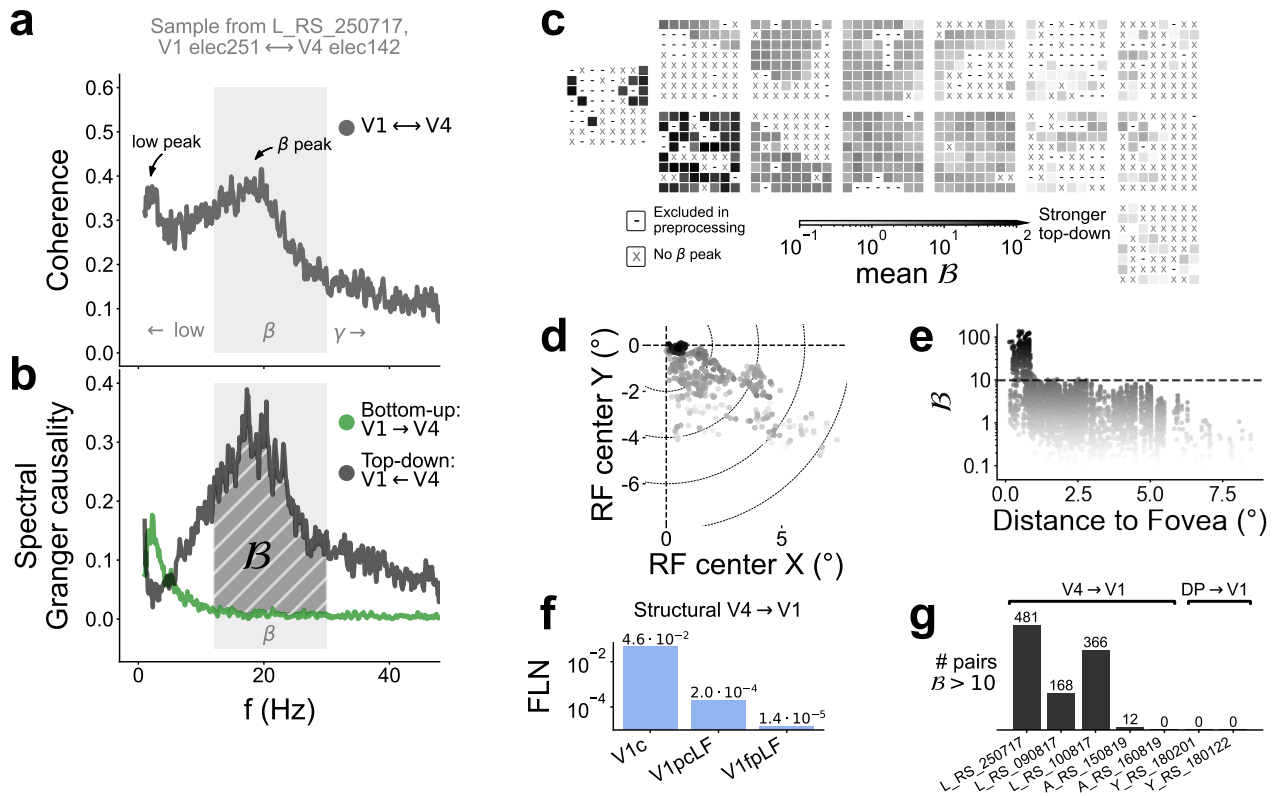

Figure 4: Inter-area coherence and spectral Granger causality. **a** Representative sample of coherence between V1 and V4 (electrodes 242 and 142, respectively). Low-frequency and beta-band peaks indicated. **b** Representative sample of spectral Granger causality. **c** Schematic representation of the electrode locations overlaid with the mean top-down signal strength  $\mathcal{B}$  per electrode (see [Coherence and Granger causality](#) for a description of  $\mathcal{B}$ ). **d** Receptive field (RF) map overlaid with the mean  $\mathcal{B}$  per electrode. Stronger  $\mathcal{B}$  is found around the foveal region of V1. **e** Mean  $\mathcal{B}$  displayed against the distance from the fovea. **f** Fraction of labelled neurons (FLN) from V4 to V1 (data from tract-tracing experiments<sup>44</sup>). V1 subdivisions represent c: central (foveal region), LF: lower visual field, pc: peri-central, and fp: far periphery. The strongest connectivity exists from V4 to V1c, in agreement with our measurements. **g** Number of electrode pairs with strong ( $\mathcal{B} > 10$ ) top-down signals detected in each session.

145 We detected beta-frequency Granger causality peaks in around 0.5% of all V1-V4 electrode pairs,  
 146 predominantly in the top-down direction (Figure S13). We only found beta-band bottom-up interactions  
 147 in V1-DP electrode pairs.

148 For the electrodes with a beta causality peak, we estimated the causality strength  $\mathcal{B}$  (Equation 5).  
 149 The electrodes with their receptive field (RF) closer to the fovea show substantially higher  $\mathcal{B}$  (Figure 4c-e,  
 150 Figure S14), in agreement with a previous structural connectivity report<sup>44</sup> (Figure 4f). To disregard  
 151 potential spurious Granger causality peaks, we restrict all further analysis of the top-down signals to  
 152 the strongest interactions, by setting a threshold of  $\mathcal{B} > 10$  (Figure 4g). We found few bottom-up  
 153 V1-to-V4 signals with high strength in the beta frequency band.

154 We thus found top-down signals from V4 to V1, in agreement with previous studies<sup>31,33,45</sup>; but we  
 155 did not find strong signals from DP to V1 in our data. V4-to-V1 signals are therefore strong candidates  
 156 for the modulation of the neural manifolds and their dimensionality.

### Stronger top-down signals from V4 to V1 during eyes-open periods

157 To elucidate the behavioural relevance of the V4-to-V1 top-down signals, we examined how the LFP  
 158 spectral power, coherence, and Granger causality change in relation to eye closure.

159 We extracted the LFP data for each behavioural condition and concatenated the data within the  
 160 same condition. This approach could introduce some artefacts, which we expect to be minor in view

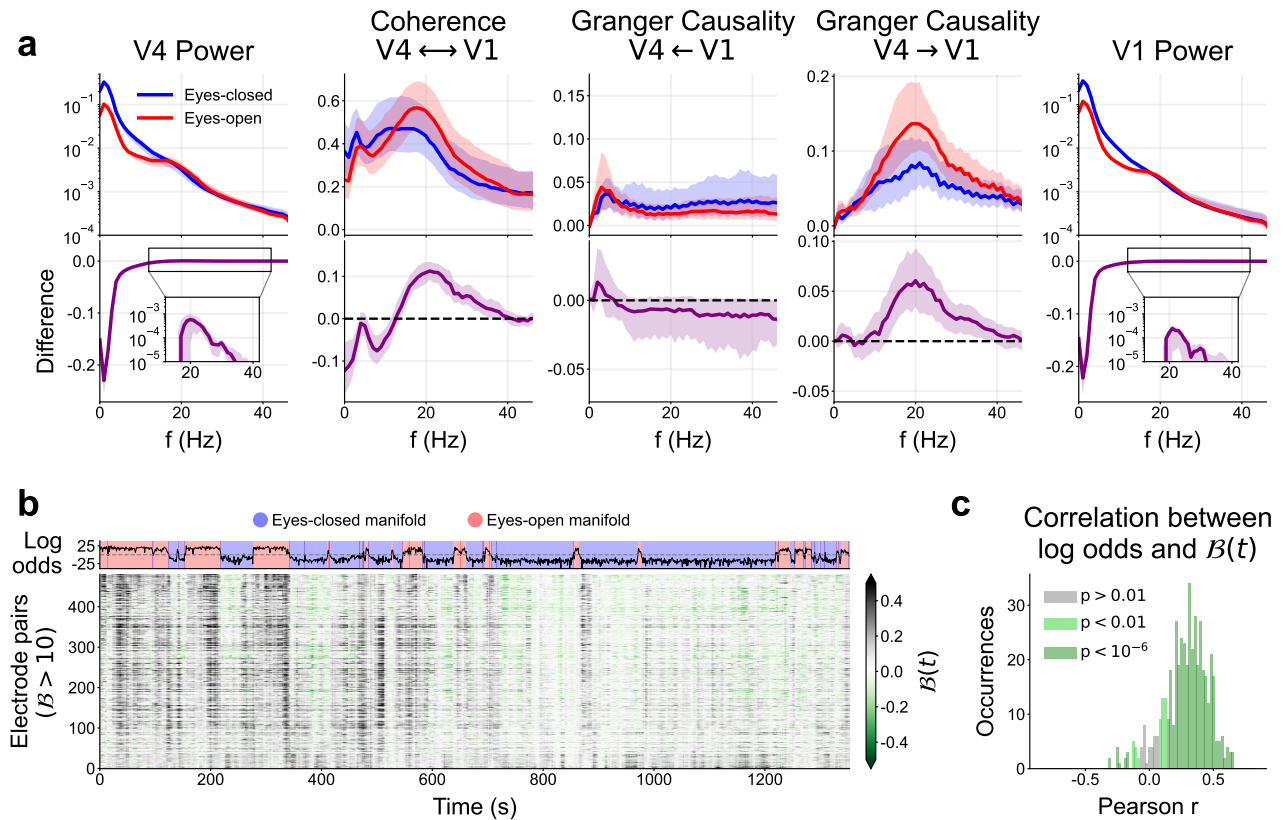

Figure 5: Stronger top-down signals from V4 to V1 during eyes-open periods. **a** Spectral power, coherence, and Granger causality of the LFP for the electrodes with high causality strength ( $\beta > 10$ ) in session L\_RS\_250717, see Figure S15 for all other sessions. The data for each behavioural condition (eyes-open/closed) were concatenated and their metrics reported separately (top row). The difference between eyes-open and eyes-closed periods was calculated for each electrode or pair of electrodes (bottom row). In all panels the thick line shows the median across electrodes (or pairs of electrodes) and shading indicates the 25th to 75th percentile. **b** Time evolution of log odds (top) and time-dependent beta-band Granger causality difference  $\beta(t)$  (bottom), for the electrode pairs with top-down signals. **c** Histogram of the Pearson correlation between the log odds and  $\beta(t)$ . Colour indicates the significance levels of the associated two-sided t-test.

161 of the very small number of transitions in comparison with the number of data samples (500 Hz  
 162 resolution). Both in V4 and V1, we find that the spectral power at low frequencies ( $< 12$  Hz)  
 163 during the eyes-closed periods, whereas the power in the beta band (12–30 Hz) is slightly higher during  
 164 eyes-open periods (Figure 5a, Figure S15). Spectrograms of the V1 LFP power confirm the reduction in  
 165 low-frequency power during eyes-open periods (Figure S17). The coherence in the beta band is higher  
 166 during the eyes-open periods, with the peak shifted to higher frequencies compared to the eyes-closed  
 167 condition. Notably, the top-down Granger causality is substantially higher in the beta band during the  
 168 eyes-open periods.

169 In order to confirm our observations, we also computed spectrograms of the Granger causality using  
 170 a 10-second sliding window (Figure S16a). Statistical tests (Welch’s t-test) of the difference between  
 171 bottom-up and top-down Granger causality,  $\Delta GC$ , confirmed a shift toward top-down interactions  
 172 during the eyes-open periods compared to the eyes-closed periods, for a vast majority of all electrode  
 173 pairs (Figure S16b,c). Thus, we found higher beta-band Granger causality during eyes-open periods  
 174 using two different approaches.

175 Additionally, to confirm the interdependence of top-down signals and the neural manifolds, we  
 176 computed the correlation between the time-varying beta-band Granger causality  $\beta(t)$  (Equation 8)  
 177 and the log odds (Figure 5b,c). An overwhelming majority of V1-V4 electrode pairs showed a highly  
 178 significant correlation ( $p < 10^{-6}$ , two-sided t-test). Thus, the top-down signals and neural manifolds  
 179 are co-dependent at a fine temporal scale, as well as within eyes-closed and eyes-open periods.



180 We further tested whether the top-down signals were correlated with gaze direction and eye  
181 movements (Figure S18), to rule out the presence of any visual stimuli—despite the experiments being  
182 performed in a dark room. No clear trend could be observed, thus indicating no relation between gaze  
183 direction and top-down signals. This finding suggests that the visual scene is not the source of the  
184 observed top-down signals.

185 In conclusion, the time-dependent spectral analysis reveals large variations of power and Granger  
186 causality. On the one hand, the spectral power at low frequencies decreases during eyes-open periods,  
187 consistent with the well-known alpha blocking phenomenon<sup>26–28</sup>. On the other hand, the V4-to-V1  
188 top-down signals are strongest during the eyes-open periods. The time-varying top-down beta causality  
189 strength did not substantially correlate with gaze direction or eye movements, suggesting no relation  
190 between the top-down signals and the visual scene; as expected in a dark room. Taken together, these  
191 results suggest that V4-to-V1 signals modulate V1 activity, contributing to a different state-space  
192 manifold with increased dimensionality.

## Discussion

193 In this paper, we presented three novel findings in the primary visual cortex (V1) of macaques during  
194 the resting state: two separate manifolds in the state space associated with eye closure (Figure 2);  
195 higher dimensionality due to lower mean cross-correlations during eyes-open periods (Figure 3); and the  
196 presence of stronger top-down signals from V4 to V1 during the eyes-open periods, primarily targeting  
197 the foveal region of V1 (Figure 4, Figure 5). In addition, we observed lower power at frequencies  
198 below 12 Hz during the eyes-open periods (Figure 5, Figure S17), consistent with the well-known alpha  
199 blocking effect<sup>26</sup>.

200 We observed that two distinct manifolds appear in the state space of macaque V1—but not V4 nor  
201 DP—during the resting state for all subjects and sessions, for both MUAe and spike data (Figure 2,  
202 S1-S6, Figure S8), and are correlated with eye closure (Figure 2e,f). The manifolds were not just an  
203 artefact of the three-dimensional projection used for visualisation, as we confirmed they also exist  
204 in higher dimensions with persistent homology (Figure S7). Previous work in mice has shown that  
205 the visual cortex represents a myriad of behaviours in the resting state, such as facial movements  
206 or running<sup>46</sup>. However, a similar study on the macaque showed that the macaque visual cortex is  
207 very specific to vision, and minimally driven by spontaneous movements<sup>47</sup>. Thus, we do not expect  
208 the neural manifolds of V1 to be strongly affected by any behaviour other than visual behaviour, in  
209 agreement with our finding that eye closure neatly explains the two manifolds.

210 Our findings could in principle be explained by the presence of complex visual stimuli that would  
211 alter the population dynamics and cortico-cortical communication. However, we are certain that no  
212 strong visual stimuli are present in the visual field, due to the very dark environment of the recording  
213 room. Additionally, we performed several analyses to control for activity levels (Figure 2 and Figure S9)  
214 and gaze direction Figure S18. Furthermore, the original data for Macaques L and A includes an  
215 extensive evaluation of data quality, which excluded all electrodes that did not strongly respond to  
216 visual stimuli<sup>42</sup>. Thus, all the electrodes included in our analysis (from Macaques L and A) would  
217 strongly respond if there were strong visual stimuli, but we observed no such responses in the MUAe  
218 activity (see Figure 2). We are therefore certain that the visual input is faint or nonexistent, which  
219 implies that the observed neural manifolds must be induced by some other internal mechanism.

220 Further characterisation of the activity in the different manifolds revealed that the neural dimension-  
221 ality is manifold-dependent (Figure 3). We observed higher dimensionality in the eyes-open manifolds  
222 across all macaque and sessions. Our measured dimensionality is in agreement with previous reports on  
223 the visual cortex<sup>10,16</sup>. Previous work has also shown higher dimensionality in the primary motor cortex  
224 during eyes-open than eyes-closed periods<sup>48</sup>, analogous to our findings in the visual cortex.

225 We hypothesised that top-down signals from higher cortical areas could be the modulatory mechanism  
226 responsible for the changes observed in the neural manifold and dimensionality of V1 activity. Indeed,  
227 we found that there are strong top-down signals from V4 to V1 (Figure 4), targeting particularly the  
228 foveal region of V1, in agreement with structural connectivity<sup>44</sup>. We also found the top-down signals to

229 vary over time, with increased presence during the eyes-open periods (Figure 5). In agreement with  
230 our findings, previous studies found that cortico-cortical top-down signals between V1 and V4 are  
231 predominantly present in the beta (12–30 Hz) frequency band, while bottom-up signals between V1  
232 and V4 are present in the delta/theta (< 8 Hz) and gamma (> 30 Hz) bands<sup>31,45</sup>. Others suggest that  
233 top-down signals from V4 to V1 are found more generally in the low frequencies (< 30 Hz), not uniquely  
234 in the beta-band<sup>33</sup>. In our analysis we did not find any gamma band causality (Figure 4), likely because  
235 our recordings were from the deep cortical layers (in macaque L and A the electrodes were 1.5 mm  
236 long, putatively recording mostly from layer 5) and gamma oscillations are known to be weak in layer 5  
237 of the visual cortex<sup>30,49</sup>. In addition, gamma activity is associated with bottom-up signals<sup>33</sup>, which  
238 we do not expect in a dark room with no visual stimuli. In contrast to our findings, van Kerkoerle  
239 et al.<sup>30</sup> reported that top-down signals appear in the alpha (8–12 Hz) frequency range. Whether the  
240 specific top-down and bottom-up frequencies generalise to the whole cortex is unclear. Instead, Vezoli  
241 et al.<sup>45</sup> postulate overlapping modules of certain frequencies (alpha, low-beta, high-beta, and gamma)  
242 that differ across cortical areas. Our findings are also consistent with the work by Semedo et al.<sup>50</sup>, who  
243 suggested that bottom-up signals dominate during visual stimulation and top-down signals dominate  
244 in the absence of visual stimuli—note that in their work the eyes were always open. We did not find  
245 top-down signals from DP to V1, possibly due to the electrodes used in macaque Y being 1 mm long,  
246 thus likely recording from layer 4, and top-down connections do not originate in nor target layer 4 of  
247 visual cortex<sup>51</sup>.

248 In the present study, it was not possible to test directly from the experimental data whether the  
249 V4-to-V1 signals are responsible for the modulation of V1 dynamics. Future studies could perform  
250 such a test by a reversible inactivation of the V4-to-V1 pathway, such as via reducing the temperature  
251 of V4<sup>52,53</sup>, injecting a GABA agonist (e.g., muscimol, bicuculline)<sup>54–56</sup> or using targeted optogenetic  
252 suppression<sup>57</sup>. These techniques have been successfully applied to study the suppression of cortico-  
253 cortical communication; however, to best of our knowledge, they have not been used to study the effects  
254 of macaque V4-to-V1 signals in the resting state.

255 Numerical simulations offer an alternative approach to study the effect of top-down signals in spiking  
256 neural networks. We thus performed preliminary simulations of a simple spiking neuron model—of the  
257 well-known Brunel type<sup>58</sup>—to ascertain whether V4-to-V1 signals can modulate the neural manifolds  
258 (Figure 6). Modelled top-down signals, in the form of sinusoidal oscillating inhomogeneous Poisson  
259 processes, led to a different neural manifold in the network activity when a subset of the network  
260 neurons was targeted (Figure 6d). These changes were not due to the increase in firing rate caused  
261 by the additional top-down input, but rather due to the activation of different neuron patterns in the  
262 model (Figure 6e,f). We limited the analysis of the model to the presence of neural manifolds, because  
263 our model was ill-suited to study the dimensionality, given that average cross-correlation is known  
264 to cancel out in balanced EI networks<sup>59,60</sup>. Future work could use more complex models—such as  
265 clustered networks<sup>59,61,62</sup>—to study the effects of correlated inputs with realistic power spectra on the  
266 dimensionality and elucidate whether the top-down signals can directly induce the observed increase in  
267 the dimensionality during the eyes-open periods.

268 Taken together, our data analysis and simulations suggest that top-down modulation alone is  
269 sufficient to cause the distinct neural manifolds in V1 activity. Nevertheless, sustaining the different V1  
270 manifolds might involve additional mechanisms, such as neuromodulation or adaptation of recurrent  
271 connectivity via short-term plasticity. Previous work suggests that N-methyl-D-aspartate (NMDA)  
272 receptors are central to the top-down communication from V4 to V1<sup>35,63</sup>. Interestingly, targeted  
273 pharmacological deactivation of NMDA receptors in macaque V1 leads to the suppression of alpha  
274 blocking<sup>28</sup> and absence of decorrelation during eyes-open<sup>64</sup>, both of which are correlated with the  
275 increased V4-to-V1 signals in our data. In addition, the top-down signals are not constant throughout  
276 the eyes-open periods (Figure S16), but the slow timescale of the NMDA receptors could help sustain the  
277 eyes-open manifold, even if the top-down input fades. Thus, we speculate that the top-down connections  
278 preferentially target the NMDA receptors in V1 neurons, leading to the observed alpha blocking and  
279 decorrelation. Another mechanisms could involve recurrent connectivity, in the form of cell-type-specific  
280 motifs. Such motifs have been shown to affect the dimensionality of brain networks<sup>39</sup>, and they could

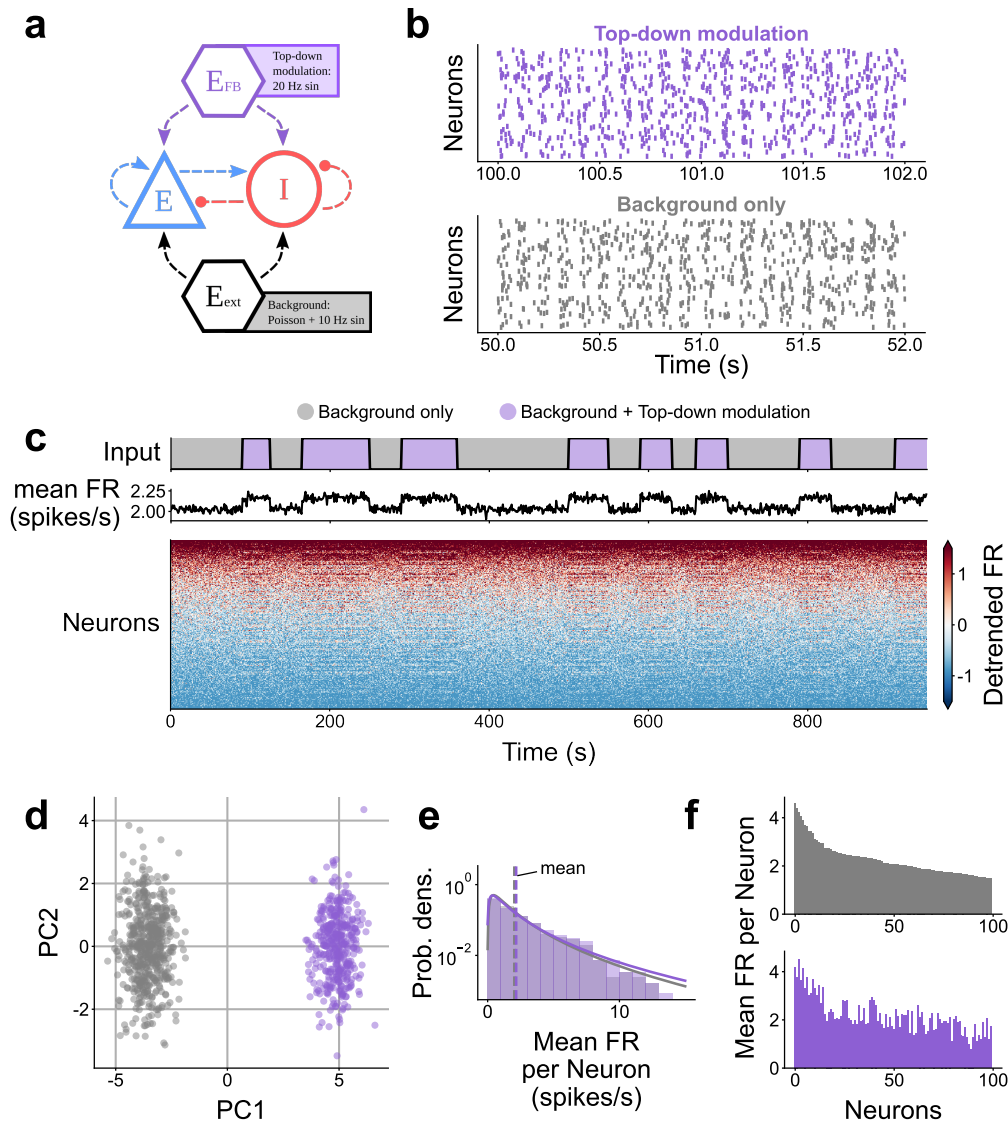

Figure 6: Simulation of a balanced spiking neural network with top-down modulation. **a** Diagram of balanced random spiking neural network. Background input is provided constantly, top-down signals are provided intermittently. **b** Sample raster plots show spiking activity in the different input regimes. **c** Time evolution of input regimes and mean firing rate (FR). **d** First two principal components of the firing rate (binsize = 1 s). Colours indicate the different input regimes. **e** Distribution of mean firing rate per neuron is almost identical between the two regimes. **f** Mean firing rate of the 100 most active neurons. The top-down modulation changes the mean firing rates of each neuron, in both the positive and negative directions, leading to the observed distinct manifolds.

281 emerge in the effective connectivity of the network as a result of the top-down input.

282 If the V4-to-V1 signals convey behavioural information, then how does such behavioural information  
 283 reach V4 in the first place? We explore the possible communication pathways that lead to the observed  
 284 V4-to-V1 signals, illustrated in Figure 7. We identified three main candidates: the visual stimulus (or  
 285 absence thereof) from the retina to V1; the proprioception of eyelid muscles via the somatosensory  
 286 cortex; and the voluntary motor commands for eye closure. The first proposed pathway involves  
 287 visual stimuli being transmitted from the retina to V1 via the lateral geniculate nucleus (LGN). The  
 288 absence of stimuli could be the reason for the observed changes in the V1 activity, whereas the presence  
 289 of visual stimuli could trigger a V1-V4 feedback loop. However, the macaques in our experiments  
 290 had very little to no visual input, even during eyes-open periods, since they were sitting in a dark  
 291 room. Additionally, we found no consistent difference in MUAe activity levels between the eyes-open

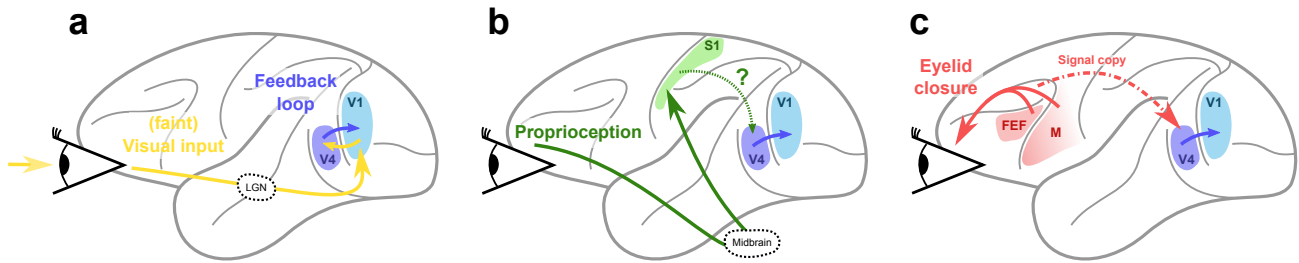

Figure 7: Proposed communication pathways for V1 modulation via V4. **a** Visual input directly to V1 triggering a cortico-cortical feedback loop. **b** Proprioception of eyelid muscles via the midbrain (possibly superior colliculus) and somatosensory cortex. **c** Cortico-cortical communication of motor commands.

292 and eyes-closed manifolds (Figure 2). The second proposed pathway involves proprioception of the  
293 eyelid that could inform the cortex when the eyes are closed and trigger the activity changes in V1.  
294 Mechanoreceptors in the eyelid activate the oculomotor nerve projecting to the midbrain (possibly to  
295 the superior colliculus)<sup>65</sup>, eventually entering the cortex via the somatosensory area (S1)<sup>66</sup>. From S1  
296 the signal could find its way to V1 via several cortico-cortical pathways, potentially including neurons  
297 in V4; however this mechanism might be relatively slow, given the absence of direct connections from  
298 S1 to V1 or V4<sup>67</sup>. Furthermore, the shortest known S1-to-V1 cortico-cortical pathway does not involve  
299 V4, rendering this pathway a rather weak candidate. The third and final proposed pathway involves  
300 voluntary eyelid closure which is initiated by the ventral motor cortex and the frontal eye field (FEF).  
301 The eyelid closure and eye movements may be communicated to the visual cortex via cortico-cortical  
302 connections or the superior colliculus. Given that V4 is part of the fronto-parietal network (with  
303 strong FEF $\rightleftharpoons$ V4 connections)<sup>67,68</sup>, the eye movement signals could easily reach V4, which could then  
304 modulate the V1 activity. A trans-thalamic pathway through the pulvinar could also assist the V4-to-V1  
305 communication, including the synchronisation of the alpha rhythm<sup>69</sup>; although such trans-thalamic  
306 connections have only been confirmed in mice so far<sup>70</sup>.

307 The hypotheses from Figure 7 are not necessarily mutually exclusive, and could all play a role in the  
308 modulation of V1 activity. To understand which pathways are most relevant to sustain the manifolds,  
309 we had a closer look around the manifold transitions (Figure S19) by looking at the MUAe signals  
310 at a high temporal resolution (1 kHz). For the eye-opening transitions, we observed that sometimes  
311 V1 MUAe activity precedes V4 activity, in agreement with the feedback loop hypothesis (Figure 7a);  
312 whereas in other cases V4 activity precedes V1 activity, in agreement with the hypotheses shown in  
313 Figure 7b,c. In the eye-closing transitions, the activity from V1 and V4 appeared to be simultaneous.  
314 The number of transitions was relatively small, which did not allow for a quantitative analysis of  
315 the transitions between the two manifolds. Further work could revisit this issue by looking at longer  
316 recordings including larger numbers of transitions between eyes-open and eyes-closed periods.

317 Given the complex mechanisms that seem to be involved in ensuring that V1 population activity  
318 adjusts to eye closure, it seems likely that it has a functional benefit. First of all, if the eyes are closed,  
319 no visual stimuli are processed and V1 firing rates are reduced to save energy. On the other hand,  
320 when the eyes are open, higher-dimensional activity might be advantageous for better encoding visual  
321 stimuli, which are known to have a high dimensionality<sup>10</sup>. This could thus facilitate visual processing.  
322 Previous work showed that spectral power in the alpha band (8–12 Hz) is inversely correlated with  
323 visual recognition performance in human subjects<sup>27,71</sup>: lower alpha power was associated with better  
324 performance in a visual discrimination task. Our results suggest that the change in neural manifolds  
325 and dimensionality are directly correlated with the decrease in alpha power (Figure 5, Figure S17).  
326 Future work could study the relation between the dimensionality, alpha power, and visual performance  
327 (e.g., response latency to different images) to determine the functional relevance of our findings.

328 In conclusion, we provide *in vivo* evidence for the modulation of neural manifolds by cortico-cortical  
329 communication, which we hypothesise could enable more efficient responses to visual stimuli. Our  
330 analysis and previous results suggest that the eyes-open manifold—together with the corresponding  
331 dimensionality and spectral power changes—constitutes a visual stand-by state, which is modulated by

<sup>332</sup> top-down input from V4 and other internal mechanisms.

## Materials and methods

### Macaques

333 We analysed the resting state data from three (N=3) rhesus macaques (*Macaca mulatta*), recorded in two  
334 different experimental laboratories. The data from macaques L & A was collected at the Netherlands  
335 Institute for Neuroscience, and previously published<sup>42</sup>. The data from macaque Y was collected at the  
336 Institut de Neurosciences de la Timone, with the recording apparatus described elsewhere<sup>43</sup>. At the  
337 time of visual cortex array implantation macaque L (male) was 7 years old and weighed 11 kg; macaque  
338 A (male) was 7 years old and weighed 12.6 kg; and macaque Y (female) was 6 years old and weighed  
339 7 kg.

340 All experimental and surgical procedures for Macaque L & A complied with the NIH Guide for Care  
341 and Use of Laboratory Animals, and were approved by the institutional animal care and use committee  
342 of the Royal Netherlands Academy of Arts and Sciences (approval number AVD-8010020171046).

343 All experimental and surgical procedures for Macaque Y were approved by the local ethical committee  
344 (C2EA 71; authorization Apafis#13894-2018030217116218v4) and conformed to the European and  
345 French government regulations.

### Electrophysiological data from macaques L & A

346 We used publicly available<sup>42</sup> neural activity recorded from the neocortex of rhesus macaques (N=2) during  
347 rest and a visual task. The macaques were implanted with 16 Utah arrays (Blackrock microsystems), two  
348 of them in visual area V4 and the rest in the primary visual cortex (V1), with a total of 1024 electrodes.  
349 The electrodes were 1.5 mm long, thus recording from the deeper layers, likely layer 5. The system  
350 recorded the electric potential at each electrode with a sampling rate of 30 kHz. A full description of  
351 the experimental setup and the data collection and preprocessing has already been published<sup>42</sup>; here  
352 we only provide the details relevant to this study.

353 Three resting-state (RS) sessions were recorded per macaque, during which the subjects did not  
354 have to perform any particular task and sat in a quiet dark room. Pupil position and diameter data  
355 were collected using an infrared camera in order to determine the direction of gaze and eye closure of  
356 the macaques. On the same days as the RS recordings, a visual response task was also performed. The  
357 visual response data were used to calculate the signal-to-noise ratio (SNR) of each electrode, and all  
358 electrodes with an SNR lower than 2 were excluded from further analysis. Additionally, we excluded  
359 up to 100 electrodes that contributed to high-frequency cross-talk in each session, as reported in the  
360 original data publication<sup>42</sup>. The sessions, duration and number of electrodes per subject are listed in  
361 [Table 1](#).

### Electrophysiological data from macaque Y

362 In addition to the published data from macaques L & A, we also used an unpublished dataset from one  
363 additional rhesus macaque (N=1). Neural activity was recorded during rest and during a visuomotor  
364 integration task. The recording apparatus is described elsewhere<sup>43</sup>. Macaque Y was implanted with five  
365 Utah arrays (Blackrock microsystems), two of them in the primary visual cortex (V1), one in dorsal  
366 prelunate cortex (area DP), one in area 7A and one in the motor cortex (M1/PMd). In this study we  
367 only included the 6x6 electrode arrays from V1 (two arrays) and DP (one array), for a total of 108  
368 electrodes. The electrodes were 1 mm long, thus recording from the central layers, likely layer 4. The  
369 recording system recorded the electric potential at each electrode with a sampling rate of 30 kHz.

370 Two resting-state (RS) sessions were recorded, during which the macaque did not have to perform  
371 any particular task and sat in a quiet dark room. Pupil position and diameter data were collected  
372 using an infrared camera in order to determine the gaze direction and eye closure of the macaque. We  
373 excluded up to 50% of the electrodes that contributed to high-frequency cross-talk in each session,  
374 similarly to the methods described in<sup>42</sup>. See [Table 1](#) for an overview of the sessions used in this study.

Table 1: Summary of subjects and recordings included in this study.

| Subject | Session     | Duration (s) | Areas | Electrodes | Clean Electrodes |
|---------|-------------|--------------|-------|------------|------------------|
| L       | L_RS_250717 | 1363         | V1    | 896        | 765              |
|         |             |              | V4    | 128        | 116              |
| L       | L_RS_090817 | 1321         | V1    | 896        | 761              |
|         |             |              | V4    | 128        | 116              |
| L       | L_RS_100817 | 1298         | V1    | 896        | 774              |
|         |             |              | V4    | 128        | 118              |
| A       | A_RS_150819 | 2278         | V1    | 896        | 402              |
|         |             |              | V4    | 128        | 11               |
| A       | A_RS_160819 | 2441         | V1    | 896        | 369              |
|         |             |              | V4    | 128        | 9                |
| Y       | Y_RS_180122 | 906          | V1    | 72         | 42               |
|         |             |              | DP    | 36         | 25               |
| Y       | Y_RS_180201 | 699          | V1    | 72         | 44               |
|         |             |              | DP    | 36         | 24               |

## MUAe and LFP signals

375 The raw neural data were processed into the multi-unit activity envelope (MUAe) signal and local  
376 field potential (LFP). To obtain MUAe data, the raw data were high-pass filtered at 500 Hz, rectified,  
377 low-pass filtered at 200 Hz, and downsampled to 1 kHz. Finally, the 50, 100, and 150 Hz components  
378 were removed with a band-stop filter in order to remove the European electric grid noise and its main  
379 harmonics. To obtain the LFP data, the raw data was low-pass filtered at 250 Hz, downsampled to 500  
380 Hz and a band-stop filter was applied to remove the European electric grid noise (50, 100, and 150 Hz).

381 The MUAe and LFP data for macaques L & A were already provided by the original authors<sup>42</sup>  
382 in the open-source .nix format, which uses python-neo data structures to hierarchically organise and  
383 annotate electrophysiological data and metadata. The metadata, such as the cross-talk removal or the  
384 positions of the arrays in the cortex, were provided in the .odml machine- and human-readable format,  
385 which were incorporated into the python analysis scripts.

## Spike sorting

386 The raw data from one session (L\_RS\_250717) were spike-sorted using a semi-automatic workflow with  
387 Spyking Circus—a free, open-source, spike-sorting software written entirely in Python<sup>72</sup>. An extensive  
388 description of the methods of this algorithm can be found in their publication, as well as in the online  
389 documentation of Spyking Circus<sup>1</sup>.

390 Roughly, Spyking Circus first applied a band-pass filter to the raw signals between 250 Hz and 5 kHz.  
391 Next, the median signal across all 128 channels that shared the same reference (2 Utah arrays) was  
392 calculated and subtracted, in order to reduce cross-talk and movement artefacts. The spike threshold was  
393 set conservatively, at eight times the standard deviation of each signal. After filtering and thresholding,  
394 the resulting multi-unit spike trains were whitened—removing the covariance from periods without  
395 spikes to reduce noise and spurious spatio-temporal correlations. After whitening, a subsample of all  
396 spike waveforms is selected, reduced to the first five principal components, and clustered into different  
397 groups with the k-medians method. Finally, all spikes in each electrode are assigned to one of the  
398 waveform clusters based on a template fitting algorithm, which can also resolve overlapping waveforms.

399 After the automatic sorting, the waveform clusters were manually merged and labelled as single-unit  
400 activity, multi-unit activity, or noise. Only single-unit activity (SUA) spike trains were included in this

<sup>1</sup>[spyking-circus.readthedocs.io](https://spyking-circus.readthedocs.io)

401 study. The waveform signal-to-noise ratio (wfSNR) was calculated for all SUA, and those with a wfSNR  
402  $< 2$  or electrode SNR  $< 2$  (from the visual response task) were excluded from the analysis.

## QUANTIFICATION AND STATISTICAL ANALYSIS

### Neural manifolds and clustering

403 The MUAe data were downsampled to 1 Hz and arranged into a single array, with between 50 and 900  
404 recording locations per session.

405 In order to visualise the data, we used a standard dimensionality reduction technique (principal  
406 component analysis, PCA) to reduce the neural manifold to 3D. The clusters observed in the RS sessions  
407 were labelled using a two-component Gaussian mixture model on the 3D projection. The clustering  
408 method provides the log odds, i.e., the chance that any given point belongs to one cluster or the other.  
409 The log odds captures the multi-cluster structure of the manifold in a single time series; thus, we  
410 consider it to be an identifier of the V1 manifolds.

### Outlier removal

411 The neural manifolds in our analysis are a collection of time points scattered across the state space. In  
412 the data some time points appear very distant from all other points, which we associate with noise and  
413 we therefore seek to remove them. To identify the outliers we used a procedure similar to the one used  
414 by Chaudhuri et al.<sup>5</sup>. First, we calculated the distance matrix of all points to each other, and took the  
415 1st percentile value from the distance distribution,  $D_1$ . We then estimated the number of neighbours  
416 that each point had within  $D_1$  distance, and finally discarded the 20 percent of points with the fewest  
417 neighbours.

### Topological data analysis

418 We used persistent homology to confirm that the lower-dimensional structures that we observed in the  
419 3D projection of the neural manifolds are in fact topological features of the data and not just an artefact  
420 of the dimensionality reduction. Before computing the persistence barcodes we projected the data into a  
421 10D subspace using the isomap technique<sup>73</sup>. The method aims at approximately preserving the geodesic  
422 distance between data points (that is the shortest path between two points on the neural manifold) and  
423 thus is suited for reducing the dimensionality of the data when applying a topological data analysis.  
424 The analysis on the 10D data showed qualitatively equivalent results to the full-dimensional data, while  
425 requiring a much shorter computation time.

426 To calculate the persistence barcodes of the Vietoris-Rips complex of the neural manifold we used  
427 an efficient open-source implementation (Ripsper<sup>2</sup>). Briefly, the algorithm successively inflates balls  
428 with radius  $r$  around each point of the manifold. If  $k$  points have a pairwise distance smaller than  $r$   
429 (that is, for all pairs of points both points are contained in the ball of the other point), they form a  
430  $(k - 1)$ D simplex. Thus, the neural manifold gives rise to a simplicial complex (a collection of simplices  
431 of potentially different dimension) the topological features of which represent the topology of the neural  
432 manifold and can be extracted computationally. As  $r$  is increased, many short-lived features appear by  
433 chance. If the manifold has complex topological structures, they should continuously appear as the  
434 radius of the balls grows for a large range of  $r$ . We computed the persistence barcode for the first three  
435 homology groups  $H_0$ ,  $H_1$  and  $H_2$ . Homology groups are topological invariants that capture topological  
436 features of a given dimension of the neural manifold. The long-lasting bars in the  $n$ -th persistence  
437 barcode correspond to the number of independent generators  $\beta_n$  of the respective homology group  $H_n$ .  
438 For low dimensionalities, they can be interpreted intuitively:  $\beta_0$  is the number of connected components,  
439  $\beta_1$  the number of 1D holes,  $\beta_2$  the number of enclosed 2D voids. Throughout all plots of this paper we  
440 display the top 1% longest-lasting barcodes for each homology group.

---

<sup>2</sup>[ripser.scikit-tda.org](https://github.com/ripser/ripser)



## Dimensionality

441 We used two different approaches to study the dimensionality of the neural data.

442 First, we compute the time-varying participation ratio (PR, Equation 1) from the covariance matrix.  
443 We take a 30 s sliding window with a 1 s offset over the MUAe data and compute the PR for each  
444 window separately. Higher activity leads to higher variance; thus, we normalised the data within each  
445 window via z-scoring to minimise this effect. The PR does not require setting an arbitrary threshold.  
446 From the time-varying PR we measured the correlation between the log odds and the PR, and the PR  
447 distribution in each manifold.

448 Second, we computed the eigenvalue distribution of the neural data within each manifold. Once  
449 again we normalised the data after sampling each manifold. The distribution appeared to follow a  
450 power law, in agreement with previous studies<sup>10</sup>. We used a linear regression in log-log space to fit a  
451 power law to our data, where the slope of the linear fit in the log-log plot corresponds to the exponent  
452  $\alpha$  of the power law.

## Coherence and Granger causality

453 To estimate the communication between cortical areas we rely on the coherence and Granger causality  
454 of the LFP.

455 Coherence is the quantification of linear correlations in the frequency domain. Such that

$$C_{xy}(f) = \frac{|S_{xy}(f)|^2}{S_{xx}(f)S_{yy}(f)} \quad (2)$$

456 where  $C_{xy}$  is the frequency ( $f$ ) dependent coherence between two signals  $x$  and  $y$ ,  $S_{xy}(f)$  is the  
457 cross-spectral density, and  $S_{xx}(f)$  and  $S_{yy}(f)$  are the auto-spectral densities.

458 In order to assess the directionality of frequency dependent interactions between the areas we applied  
459 spectral Granger causality analysis to the LFP recordings<sup>74</sup>. We first computed the cross-spectral  
460 matrix  $S(f)$  with the multitaper method. To this end, we subdivided the chosen signal pairs into  
461 10 s long segments. These were processed individually with 3 Slepian tapers and averaged in the end.  
462 This yielded the cross-spectrum. The segments had an overlap of 50%. Next, we decomposed the  
463 cross-spectrum into the covariance matrix  $\Sigma$  and the transfer function  $H(f)$  with the Wilson spectral  
464 matrix factorisation<sup>75</sup>, obtaining the matrix equation

$$S = H(f)\Sigma H^\dagger(f). \quad (3)$$

465 With these factors, one is able to obtain a version of directional functional connectivity between the  
466 first and second signals via

$$\text{GC}_{x \rightarrow y}(f) = \frac{S_{xx}(f)}{\tilde{H}_{xx}(f)\Sigma_{xx}\tilde{H}_{xx}^\dagger(f)} \quad (4)$$

467 where  $\tilde{H}_{xx}(f) = H_{xx}(f) + \Sigma_{xy}/\Sigma_{xx}H_{xy}(f)$  and mutatis mutandis for the influence of the second onto  
468 the first signal. The analysis was performed for all pairs of channels between the areas that exhibited a  
469 peak in the coherence in the  $\beta$  band  $12 \text{ Hz} < f < 30 \text{ Hz}$ .

470 We quantify the beta-band Granger causality strength as

$$\mathcal{B} = \sum_{f=12 \text{ Hz}}^{f=30 \text{ Hz}} \text{GC}_{x \leftarrow y}(f) - \text{GC}_{x \rightarrow y}(f). \quad (5)$$

471 We also analysed the time-varying spectral Granger causality. For this aim we used 10 s windows  
472 and moved them across the data with 1 s steps, for a final time resolution of 1 Hz. We calculated the  
473 spectral Granger causality for each window separately. The initial and final 5 s were discarded to avoid  
474 disruptions at the boundaries. So the time-varying causality spectrogram is

$$\text{GC}_{x \rightarrow y}(t, f) = \text{GC}_{x \rightarrow y}(f) \Big|_{[t_0, t_1]}, \dots, \text{GC}_{x \rightarrow y}(f) \Big|_{[t_{n-1}, t_n]} \quad (6)$$

475 and mutatis mutandis for the  $y \rightarrow x$  direction.

476 Finally, we also define the time-varying Granger causality difference

$$\Delta GC(t, f) = GC_{x \leftarrow y}(t, f) - GC_{x \rightarrow y}(t, f), \quad (7)$$

477 which summed over the beta band we call

$$\mathcal{B}(t) = \sum_{f=12 \text{ Hz}}^{f=30 \text{ Hz}} \Delta GC(t, f). \quad (8)$$

478 Note that

$$\mathcal{B} \neq \frac{\sum_i^N \mathcal{B}(t_i)}{N} \quad (9)$$

479 due to the nonlinearities in the Granger causality calculation.

480 Both the coherence and spectral Granger causality were implemented in the Electrophysiology  
481 Analysis Toolkit (Elephant)<sup>76</sup>.

## Peak detection

Table 2: Peak detection algorithm parameters.

### CWT peak detection parameters

|               |              |                                                                |
|---------------|--------------|----------------------------------------------------------------|
| widths        | 100 – 500 Hz | Width range for CWT matrix.                                    |
| width_step    | 0.1 Hz       | Step between widths.                                           |
| wavelet       | Ricker       | Wavelet used for convolution.                                  |
| max_distances | widths / 4   | Criterion to consider ridge lines connected.                   |
| gap_thresh    | 10 Hz        | Ridge lines farther apart will not be connected.               |
| min_length    | 225          | Minimum length of ridge lines.                                 |
| min_snr       | 1            | Minimum snr of ridge lines.                                    |
| noise_perc    | 10           | Percentile of ridge line considered noise for snr calculation. |

482 To detect coherence and Granger causality peaks (used to identify admissible channel pairs for our  
483 analysis) we used a standard peak detection algorithm for 1D arrays using wavelet transforms. We  
484 computed the continuous wavelet transform (cwt) for wavelets with widths from 10 Hz to 100 Hz (at  
485 0.1 Hz steps), using a Ricker wavelet—i.e., a Mexican hat. Next, we searched for ridge lines in the  
486 cwt—peaks across different wavelet lengths—following standard criteria<sup>77</sup>. Finally, the ridge lines were  
487 filtered based on their total length, gaps, and signal-to-noise ratio (snr). The resulting ridge lines (if  
488 any) were considered as peaks in the coherence.

489 The detected peaks tended to be broad, since our parameter choice intentionally rejected narrow  
490 peaks. We chose this configuration in favour of robustness and to minimise false positives. Nevertheless,  
491 peaks were detected for a majority of electrode pairs.

## Spiking neural network simulations

492 To investigate the hypothesis that top-down signals in the  $\beta$ -band induce a change in the population  
493 dynamics and dimensionality, we conducted a spiking neural network simulation. The network consists  
494 of 10,000 excitatory and 2,000 inhibitory leaky integrate-and-fire (LIF) neurons with exponential  
495 post-synaptic currents. Pairs of neurons are randomly connected with a connection probability of  
496  $p = 0.1$ . The spike transmission delay is randomly sampled following a log-normal distribution. Generally  
497 speaking, the simulation experiments consist of two parts corresponding to the two states observed in the  
498 neuronal activity. In the first state (background state), the input consists of spike trains sampled from

Table 3: General model description

| <b>Model Summary</b>            |                                                                                                                                                                                               |
|---------------------------------|-----------------------------------------------------------------------------------------------------------------------------------------------------------------------------------------------|
| Populations                     | two populations, one excitatory, one inhibitory                                                                                                                                               |
| Connectivity                    | random connectivity                                                                                                                                                                           |
| Neuron model                    | leaky integrate-and-fire model                                                                                                                                                                |
| Synapse model                   | alpha-function shaped postsynaptic current                                                                                                                                                    |
| Input                           | independent spike trains from inhomogeneous Poisson processes with given rate $r(t)$                                                                                                          |
| <b>Neuron and synapse model</b> |                                                                                                                                                                                               |
| Subthreshold dynamics           | $\frac{dV}{dt} = -\frac{V}{\tau_m} + \frac{I_{\text{syn}}(t)}{C_m},$ $I_{\text{syn}}(t) = J \frac{e}{\tau_{\text{syn}}} (t - t^* - d) e^{-(t-t^*-d)/\tau_{\text{syn}}} \times H(t - t^* - d)$ |
| Spiking                         | If $V(t-) < \theta$ and $V(t+) \geq \theta$ ,<br>1. Set $t^* = t$ and $V(t) = V_0$ , and<br>2. Emit spike with time stamp $t^*$ .                                                             |
| <b>Connectivity</b>             |                                                                                                                                                                                               |
| Type                            | pairwise Bernoulli, i.e., for each pair of neurons generate a synapse with probability $p$                                                                                                    |
| Weights                         | fixed source- and target-population-specific weights                                                                                                                                          |
| Delays                          | log-normally distributed delays for excitatory and inhibitory neurons                                                                                                                         |
| <b>Input</b>                    |                                                                                                                                                                                               |
| Background                      | $r(t) = \max(0, \nu_{\text{base}}^{\text{bg}} + \nu_{\text{amp}}^{\text{bg}} \cdot \sin(2\pi f^{\text{bg}} \cdot t))$                                                                         |
| Top-down modulation             | $r(t) = \max(0, \nu_{\text{base}}^{\text{td}} + \nu_{\text{amp}}^{\text{td}} \cdot \sin(2\pi f^{\text{td}} \cdot t))$                                                                         |

499 an inhomogeneous Poisson process with a baseline rate of  $\nu_{\text{bg}}$  Hz that is modulated with a 1 Hz sinusoidal  
 500 oscillation. In the second state, the network additionally receives input spike trains from inhomogeneous  
 501 Poisson processes with rates oscillating at 20 Hz. The first state represents the eyes-closed, the second  
 502 the eyes-open condition. Both input regimes provide independent input to each neuron, based on  
 503 the same rate profiles. During the simulation, we recorded the spiking activity of 1,000 excitatory  
 504 and 200 inhibitory neurons. We provided the top-down modulation to a subset of the neurons in the  
 505 network. We targeted 50% of both the excitatory and inhibitory population. During the simulation, we  
 506 distinguish two manifolds corresponding to the eyes-open and eyes-closed periods during the recordings.  
 507 See Table 3, Table 4 for a full description of the network and the experiments. For the simulations we  
 508 used NEST (version 3.3)<sup>78</sup>.

Table 4: Simulation parameters.

| <b>Population Parameters</b>                |               |                                                                      |
|---------------------------------------------|---------------|----------------------------------------------------------------------|
| $N_{\text{ex}}$                             | 10,000        | number of excitatory neurons                                         |
| $N_{\text{in}}$                             | 2,000         | number of inhibitory neurons                                         |
| <b>Connectivity Parameters</b>              |               |                                                                      |
| $p$                                         | 0.1           | connection probability                                               |
| <b>Neuron parameters</b>                    |               |                                                                      |
| $\tau_m$                                    | 20 ms         | membrane time constant                                               |
| $\tau_r$                                    | 2 ms          | absolute refractory period                                           |
| $\tau_{\text{syn}}$                         | 2 ms          | postsynaptic current time constant                                   |
| $C_m$                                       | 250 pF        | membrane capacity                                                    |
| $V_m$                                       | 0 mV          | resting potential                                                    |
| $E_L$                                       | 0 mV          | membrane capacity                                                    |
| $V_{\text{reset}}$                          | 0 mV          | reset membrane potential                                             |
| $V_{\text{th}}$                             | 20 mV         | threshold                                                            |
| <b>Stimulus parameters: Background</b>      |               |                                                                      |
| $\nu_{\text{base}}^{\text{bg}}$             | 8682 spikes/s | baseline rate                                                        |
| $\nu_{\text{amp}}^{\text{bg}}$              | 2170 spikes/s | amplitude                                                            |
| $f$                                         | 10 Hz         | sinusoidal oscillation frequency                                     |
| <b>Stimulus parameters: Top-down signal</b> |               |                                                                      |
| $\nu_{\text{base}}^{\text{td}}$             | 0 spikes/s    | base line rate                                                       |
| $\nu_{\text{amp}}^{\text{td}}$              | 723 spikes/s  | amplitude                                                            |
| $f$                                         | 20 Hz         | sinusoidal oscillation frequency                                     |
| $p^{\text{td}}$                             | 0.5           | fraction of neurons targeted by top-down modulation in setup 1 and 3 |
| $p^{\text{td}}$                             | 1             | fraction of neurons targeted by top-down modulation in setup 2       |
| <b>Synapse parameters</b>                   |               |                                                                      |
| $J_{EE}$                                    | 6.4 pA        | synaptic efficacy excitatory to excitatory                           |
| $J_{IE}$                                    | 9.5 pA        | synaptic efficacy excitatory to inhibitory                           |
| $g$                                         | 4             | relative inhibitory synaptic efficacy                                |
| $J_{EI}$                                    | $-g * J_{EE}$ | synaptic efficacy inhibitory to excitatory                           |
| $J_{II}$                                    | $-g * J_{EE}$ | synaptic efficacy inhibitory to inhibitory                           |
| <b>Delay parameters</b>                     |               |                                                                      |
| $\mu_{\text{ex}}$                           | 1.5 ms        | mean of lognormal distribution for excitatory connections            |
| $\mu_{\text{in}}$                           | 0.75 ms       | mean of lognormal distribution for inhibitory connections            |
| $\sigma_{\text{ex,in}}$                     | 0.5 ms        | standard deviation of lognormal distribution for all connections     |

## Author contributions

509 AMG, JI, and AK conceptualised the study. AMG curated and processed the data from macaques L  
510 and A. AKJ curated and processed the data from macaque Y, with minor inputs from AMG. AMG  
511 and AK performed the dimensionality analysis, statistical testing, and Granger causality analysis. AK  
512 performed the spiking neuron network simulations and AMG analyzed the results. AMG created all  
513 figures, with feedback from all other authors. AMG wrote the initial manuscript; all other authors  
514 reviewed the manuscript and provided feedback. JI, SG, and SvA supervised the project, guiding the  
515 scope via active discussions. SG and SvA procured the funding and provided the necessary resources.

## Acknowledgements

516 We thank David Dahmen for his support with the dimensionality analysis and modelling. We thank  
517 Simon Essink, Peter Bouss and Tobias Kühn for useful feedback about the manifolds and dimensionality.  
518 This project received funding from the DFG Priority Program (SPP 2041 "Computational Con-  
519 nectomics") [S.J.van Albada: AL 2041/1-1]; the EU's Horizon 2020 Framework Grant Agreement  
520 No. 945539 (Human Brain Project SGA3); the FLAG-ERA grant PrimCorNet; the DFG (RTG 2416  
521 "MultiSenses-MultiScales"); the NRW-network 'iBehave' (grant number NW21-049), and the CNRS  
522 Multidisciplinary Exploratory Projects initiative.

## Declaration of Interests

523 The authors declare that the research was conducted in the absence of any commercial or financial  
524 relationships that could be construed as a potential conflict of interest.

## References

- 525 [1] Peiran Gao, Eric Trautmann, Byron Yu, Gopal Santhanam, Stephen Ryu, Krishna Shenoy, and Surya Ganguli. A  
526 theory of multineuronal dimensionality, dynamics and measurement. *bioRxiv*, 2017. doi: 10.1101/214262. URL  
527 <https://www.biorxiv.org/content/10.1101/214262v2>.
- 528 [2] Juan A. Gallego, Matthew G. Perich, Lee E. Miller, and Sara A. Solla. Neural Manifolds for the Control of  
529 Movement. *Neuron*, 94(5):978–984, 2017. ISSN 0896-6273. doi: 10.1016/j.neuron.2017.05.025. URL [https://www.cell.com/neuron/abstract/S0896-6273\(17\)30463-4](https://www.cell.com/neuron/abstract/S0896-6273(17)30463-4).
- 531 [3] Juan A. Gallego, Matthew G. Perich, Stephanie N. Naufel, Christian Ethier, Sara A. Solla, and Lee E. Miller. Cortical  
532 population activity within a preserved neural manifold underlies multiple motor behaviors. *Nature Communications*,  
533 9(1):1–13, 2018. ISSN 2041-1723. doi: 10.1038/s41467-018-06560-z. URL <https://www.nature.com/articles/s41467-018-06560-z>.
- 535 [4] Barbara Feulner and Claudia Clopath. Neural manifold under plasticity in a goal driven learning behaviour. *PLoS*  
536 *Computational Biology*, 17(2):e1008621, February 2021. ISSN 1553-7358. doi: 10.1371/journal.pcbi.1008621. URL  
537 <https://dx.plos.org/10.1371/journal.pcbi.1008621>.
- 538 [5] Rishidev Chaudhuri, Berk Gerçek, Biraj Pandey, Adrien Peyrache, and Ila Fiete. The intrinsic attractor manifold  
539 and population dynamics of a canonical cognitive circuit across waking and sleep. *Nature Neuroscience*, 22(9):  
540 1512–1520, 2019. ISSN 1546-1726. doi: 10.1038/s41593-019-0460-x. URL <https://www.nature.com/articles/s41593-019-0460-x>.
- 542 [6] Valerio Mante, David Sussillo, Krishna V. Shenoy, and William T. Newsome. Context-dependent computation by  
543 recurrent dynamics in prefrontal cortex. *Nature*, 503(7474):78–84, November 2013. ISSN 0028-0836, 1476-4687. doi:  
544 10.1038/nature12742. URL <http://www.nature.com/articles/nature12742>.
- 545 [7] Mark M. Churchland, John P. Cunningham, Matthew T. Kaufman, Justin D. Foster, Paul Nuyujukian, Stephen I.  
546 Ryu, and Krishna V. Shenoy. Neural population dynamics during reaching. *Nature*, 487(7405):51–56, July 2012. ISSN  
547 0028-0836, 1476-4687. doi: 10.1038/nature11129. URL <http://www.nature.com/articles/nature11129>.
- 548 [8] Anqi Wu, Stan Pashkovski, Sandeep R Datta, and Jonathan W Pillow. Learning a latent manifold of odor  
549 representations from neural responses in piriform cortex. In S. Bengio, H. Wallach, H. Larochelle, K. Grauman,  
550 N. Cesa-Bianchi, and R. Garnett, editors, *Advances in Neural Information Processing Systems*, volume 31, 2018. URL  
551 <https://proceedings.neurips.cc/paper/2018/file/17b3c7061788dbe82de5abe9f6fe22b3-Paper.pdf>.
- 552 [9] Richard J. Gardner, Erik Hermansen, Marius Pachitariu, Yoram Burak, Nils A. Baas, Benjamin A. Dunn, May-Britt  
553 Moser, and Edvard I. Moser. Toroidal topology of population activity in grid cells. *Nature*, 602(7895):123–128,  
554 2022. ISSN 0028-0836, 1476-4687. doi: 10.1038/s41586-021-04268-7. URL <https://www.nature.com/articles/s41586-021-04268-7>.
- 556 [10] Carsen Stringer, Marius Pachitariu, Nicholas Steinmetz, Matteo Carandini, and Kenneth D. Harris. High-dimensional  
557 geometry of population responses in visual cortex. *Nature*, 571(7765):361–365, 2019. ISSN 1476-4687. doi: 10.1038/  
558 s41586-019-1346-5. URL <https://www.nature.com/articles/s41586-019-1346-5>.

- 559 [11] Emmanouil Froudarakis, Uri Cohen, Maria Diamantaki, Edgar Y. Walker, Jacob Reimer, Philipp Berens, Haim  
560 Sompolinsky, and Andreas S. Tolias. Object manifold geometry across the mouse cortical visual hierarchy. *bioRxiv*,  
561 2020. doi: 10.1101/2020.08.20.258798. URL <http://biorxiv.org/lookup/doi/10.1101/2020.08.20.258798>.
- 562 [12] Gurjeet Singh, Facundo Memoli, Tigran Ishkhanov, Guillermo Sapiro, Gunnar Carlsson, and Dario L. Ringach.  
563 Topological analysis of population activity in visual cortex. *Journal of Vision*, 8(8):11–11, 2008. ISSN 1534-7362. doi:  
564 10.1167/8.8.11. URL <https://jov.arvojournals.org/article.aspx?articleid=2193262>.
- 565 [13] Luca Baroni, Mohammad Bashiri, Konstantin Friedrich Willeke, Ján Antolík, and Fabian H. Sinz. Learning invariance  
566 manifolds of visual sensory neurons. In *NeurIPS 2022 Workshop on Symmetry and Geometry in Neural Representations*,  
567 2022. URL <https://openreview.net/forum?id=2dQyENiU330>.
- 568 [14] Robert Ghrist. Barcodes: The persistent topology of data. *Bulletin of the American Mathematical Society*, 45(1):  
569 61–75, 2008. ISSN 0273-0979, 1088-9485. doi: 10.1090/S0273-0979-07-01191-3. URL [https://www.ams.org/bull/  
570 2008-45-01/S0273-0979-07-01191-3/](https://www.ams.org/bull/2008-45-01/S0273-0979-07-01191-3/).
- 571 [15] John P Cunningham and Byron M Yu. Dimensionality reduction for large-scale neural recordings. *Nature Neuroscience*,  
572 17(11):1500–1509, November 2014. ISSN 1097-6256, 1546-1726. doi: 10.1038/nn.3776. URL [http://www.nature.  
573 com/articles/nn.3776](http://www.nature.com/articles/nn.3776).
- 574 [16] Peiran Gao and Surya Ganguli. On simplicity and complexity in the brave new world of large-scale neuroscience.  
575 *Current Opinion in Neurobiology*, 32:148–155, 2015. ISSN 09594388. doi: 10.1016/j.conb.2015.04.003. URL  
576 <https://linkinghub.elsevier.com/retrieve/pii/S0959438815000768>.
- 577 [17] Rich Pang, Benjamin J. Lansdell, and Adrienne L. Fairhall. Dimensionality reduction in neuroscience. *Current*  
578 *Biology*, 26(14):R656–R660, July 2016. ISSN 09609822. doi: 10.1016/j.cub.2016.05.029. URL [https://linkinghub.  
579 elsevier.com/retrieve/pii/S0960982216304870](https://linkinghub.elsevier.com/retrieve/pii/S0960982216304870).
- 580 [18] Ryan C. Williamson, Benjamin R. Cowley, Ashok Litwin-Kumar, Brent Doiron, Adam Kohn, Matthew A. Smith, and  
581 Byron M. Yu. Scaling Properties of Dimensionality Reduction for Neural Populations and Network Models. *PLOS*  
582 *Computational Biology*, 12(12):e1005141, December 2016. ISSN 1553-7358. doi: 10.1371/journal.pcbi.1005141. URL  
583 <https://dx.plos.org/10.1371/journal.pcbi.1005141>.
- 584 [19] Luca Mazzucato, Alfredo Fontanini, and Giancarlo La Camera. Stimuli Reduce the Dimensionality of Cortical  
585 Activity. *Frontiers in Systems Neuroscience*, 10, February 2016. ISSN 1662-5137. doi: 10.3389/fnsys.2016.00011.  
586 URL <http://journal.frontiersin.org/Article/10.3389/fnsys.2016.00011/abstract>.
- 587 [20] Lilach Avitan and Carsen Stringer. Not so spontaneous: Multi-dimensional representations of behaviors and context  
588 in sensory areas. *Neuron*, page S0896627322005888, July 2022. ISSN 08966273. doi: 10.1016/j.neuron.2022.06.019.  
589 URL <https://linkinghub.elsevier.com/retrieve/pii/S0896627322005888>.
- 590 [21] Esther Marx, Thomas Stephan, Annina Nolte, Angela Deutschländer, Klaus C Seelos, Marianne Dieterich, and  
591 Thomas Brandt. Eye closure in darkness animates sensory systems. *NeuroImage*, 19(3):924–934, 2003. ISSN 10538119.  
592 doi: 10.1016/S1053-8119(03)00150-2. URL <https://linkinghub.elsevier.com/retrieve/pii/S1053811903001502>.
- 593 [22] Esther Marx, Angela Deutschländer, Thomas Stephan, Marianne Dieterich, Martin Wiesmann, and Thomas Brandt.  
594 Eyes open and eyes closed as rest conditions: impact on brain activation patterns. *NeuroImage*, 21(4):1818–1824,  
595 2004. ISSN 10538119. doi: 10.1016/j.neuroimage.2003.12.026. URL [https://linkinghub.elsevier.com/retrieve/  
596 pii/S1053811903007936](https://linkinghub.elsevier.com/retrieve/pii/S1053811903007936).
- 597 [23] Yu. A. Boytsova and S. G. Danko. EEG differences between resting states with eyes open and closed in darkness.  
598 *Human Physiology*, 36(3):367–369, 2010. ISSN 0362-1197, 1608-3164. doi: 10.1134/S0362119710030199. URL  
599 <http://link.springer.com/10.1134/S0362119710030199>.
- 600 [24] Mark McAvoy, Linda Larson-Prior, Marek Ludwikow, Dongyang Zhang, Abraham Z. Snyder, Debra L. Gusnard,  
601 Marcus E. Raichle, and Giovanni d’Avossa. Dissociated mean and functional connectivity BOLD signals in visual  
602 cortex during eyes closed and fixation. *Journal of Neurophysiology*, 108(9):2363–2372, 2012. ISSN 0022-3077, 1522-1598.  
603 doi: 10.1152/jn.00900.2011. URL <https://www.physiology.org/doi/10.1152/jn.00900.2011>.
- 604 [25] Stefan Brodoehl, Carsten M. Klingner, and Otto W. Witte. Eye closure enhances dark night perceptions. *Scientific*  
605 *Reports*, 5(1):10515, 2015. ISSN 2045-2322. doi: 10.1038/srep10515. URL [http://www.nature.com/articles/  
606 srep10515](http://www.nature.com/articles/srep10515).
- 607 [26] Hans Berger. Über das Elektrenkephalogramm des Menschen. *Archiv für Psychiatrie und Nervenkrankheiten*, 87(1):  
608 527–570, December 1929. ISSN 0003-9373, 1433-8491. doi: 10.1007/BF01797193. URL [http://link.springer.com/  
609 10.1007/BF01797193](http://link.springer.com/10.1007/BF01797193).
- 610 [27] Wolfgang Klimesch, Paul Sauseng, and Simon Hanslmayr. EEG alpha oscillations: The inhibition–timing hypothesis.  
611 *Brain Research Reviews*, 53(1):63–88, 2007. ISSN 01650173. doi: 10.1016/j.brainresrev.2006.06.003.

- 612 [28] David T.J. Liley and Suresh D. Muthukumaraswamy. Evidence that alpha blocking is due to increases in system-level  
613 oscillatory damping not neuronal population desynchronisation. *NeuroImage*, 208:116–408, March 2020. ISSN  
614 10538119. doi: 10.1016/j.neuroimage.2019.116408.
- 615 [29] Xing Chen, Feng Wang, Eduardo Fernandez, and Pieter R. Roelfsema. Shape perception via a high-channel-count  
616 neuroprosthesis in monkey visual cortex. *Science*, 370(6521):1191–1196, 2020. ISSN 0036-8075, 1095-9203. doi:  
617 10.1126/science.abd7435. URL <https://www.science.org/doi/10.1126/science.abd7435>.
- 618 [30] Timo van Kerkoerle, Matthew W. Self, Bruno Dagnino, Marie-Alice Gariel-Mathis, Jasper Poort, Chris van der  
619 Togt, and Pieter R. Roelfsema. Alpha and gamma oscillations characterize feedback and feedforward processing in  
620 monkey visual cortex. *Proceedings of the National Academy of Sciences*, 111(40):14332–14341, 2014. ISSN 0027-8424,  
621 1091-6490. doi: 10.1073/pnas.1402773111. URL <http://www.pnas.org/lookup/doi/10.1073/pnas.1402773111>.
- 622 [31] André Moraes Bastos, Julien Vezoli, Conrado Arturo Bosman, Jan-Mathijs Schoffelen, Robert Oostenveld, Jar-  
623 rod Robert Dowdall, Peter De Weerd, Henry Kennedy, and Pascal Fries. Visual Areas Exert Feedforward and  
624 Feedback Influences through Distinct Frequency Channels. *Neuron*, 85(2):390–401, 2015. ISSN 08966273. doi:  
625 10.1016/j.neuron.2014.12.018. URL <https://linkinghub.elsevier.com/retrieve/pii/S089662731401099X>.
- 626 [32] P. Christiaan Klink, Bruno Dagnino, Marie-Alice Gariel-Mathis, and Pieter R. Roelfsema. Distinct Feedforward and  
627 Feedback Effects of Microstimulation in Visual Cortex Reveal Neural Mechanisms of Texture Segregation. *Neuron*, 95  
628 (1):209–220.e3, 2017. ISSN 08966273. doi: 10.1016/j.neuron.2017.05.033. URL [https://linkinghub.elsevier.com/](https://linkinghub.elsevier.com/retrieve/pii/S0896627317304713)  
629 [retrieve/pii/S0896627317304713](https://linkinghub.elsevier.com/retrieve/pii/S0896627317304713).
- 630 [33] Demetrio Ferro, Jochem van Kempen, Michael Boyd, Stefano Panzeri, and Alexander Thiele. Directed information  
631 exchange between cortical layers in macaque V1 and V4 and its modulation by selective attention. *Proceedings of the*  
632 *National Academy of Sciences*, 118(12):e2022097118, 2021. ISSN 0027-8424, 1091-6490. doi: 10.1073/pnas.2022097118.  
633 URL <http://www.pnas.org/lookup/doi/10.1073/pnas.2022097118>.
- 634 [34] Jasper Poort, Florian Raudies, Aurel Wannig, Victor A.F. Lamme, Heiko Neumann, and Pieter R. Roelfsema. The  
635 Role of Attention in Figure-Ground Segregation in Areas V1 and V4 of the Visual Cortex. *Neuron*, 75(1):143–156,  
636 July 2012. ISSN 08966273. doi: 10.1016/j.neuron.2012.04.032. URL [https://linkinghub.elsevier.com/retrieve/](https://linkinghub.elsevier.com/retrieve/pii/S0896627312004369)  
637 [pii/S0896627312004369](https://linkinghub.elsevier.com/retrieve/pii/S0896627312004369).
- 638 [35] Matthew W. Self, Timo van Kerkoerle, Hans Supèr, and Pieter R. Roelfsema. Distinct Roles of the Cortical  
639 Layers of Area V1 in Figure-Ground Segregation. *Current Biology*, 23(21):2121–2129, 2013. ISSN 09609822. doi:  
640 10.1016/j.cub.2013.09.013. URL <https://linkinghub.elsevier.com/retrieve/pii/S0960982213011299>.
- 641 [36] Timo van Kerkoerle, Matthew W. Self, and Pieter R. Roelfsema. Layer-specificity in the effects of attention and  
642 working memory on activity in primary visual cortex. *Nature Communications*, 8(1):13804, 2017. ISSN 2041-1723.  
643 doi: 10.1038/ncomms13804. URL <http://www.nature.com/articles/ncomms13804>.
- 644 [37] Hualou Liang, Xiajing Gong, Minggui Chen, Yin Yan, Wu Li, and Charles D. Gilbert. Interactions between feedback  
645 and lateral connections in the primary visual cortex. *Proceedings of the National Academy of Sciences*, 114(32):  
646 8637–8642, 2017. ISSN 0027-8424, 1091-6490. doi: 10.1073/pnas.1706183114. URL [http://www.pnas.org/lookup/](http://www.pnas.org/lookup/doi/10.1073/pnas.1706183114)  
647 [doi/10.1073/pnas.1706183114](http://www.pnas.org/lookup/doi/10.1073/pnas.1706183114).
- 648 [38] Laura B Naumann, Joram Keijser, and Henning Sprekeler. Invariant neural subspaces maintained by feedback  
649 modulation. *eLife*, 11:e76096, 2022. ISSN 2050-084X. doi: 10.7554/eLife.76096. URL [https://elifesciences.org/](https://elifesciences.org/articles/76096)  
650 [articles/76096](https://elifesciences.org/articles/76096).
- 651 [39] David Dahmen, Stefano Recanatesi, Xiaoxuan Jia, Gabriel K. Ocker, Luke Campagnola, Tim Jarsky, Stephanie  
652 Seeman, Moritz Helias, and Eric Shea-Brown. Strong and localized recurrence controls dimensionality of neural  
653 activity across brain areas. *bioRxiv*, 2020. doi: 10.1101/2020.11.02.365072. URL [http://biorxiv.org/lookup/doi/](http://biorxiv.org/lookup/doi/10.1101/2020.11.02.365072)  
654 [10.1101/2020.11.02.365072](http://biorxiv.org/lookup/doi/10.1101/2020.11.02.365072).
- 655 [40] Ad Aertsen and Hubert Preissl. Dynamics of activity and connectivity in physiological neuronal networks. *Nonlinear*  
656 *Dynamics and Neuronal Networks*, pages 281–301, 1991.
- 657 [41] Hans Supèr and Pieter R. Roelfsema. Chronic multiunit recordings in behaving animals: advantages and limitations.  
658 *Progress in Brain Research*, 147:263–282, 2005. doi: 10.1016/S0079-6123(04)47020-4.
- 659 [42] Xing Chen, Aitor Morales-Gregorio, Julia Sprenger, Alexander Kleinjohann, Shashwat Sridhar, Sacha J. van  
660 Albada, Sonja Grün, and Pieter R. Roelfsema. 1024-channel electrophysiological recordings in macaque V1 and  
661 V4 during resting state. *Scientific Data*, 9(1):77, 2022. ISSN 2052-4463. doi: 10.1038/s41597-022-01180-1. URL  
662 <https://www.nature.com/articles/s41597-022-01180-1>.

- 663 [43] Marcel Jan de Haan, Thomas Brochier, Sonja Grün, Alexa Riehle, and Frédéric V. Barthélemy. Real-time visuomotor  
664 behavior and electrophysiology recording setup for use with humans and monkeys. *Journal of Neurophysiology*, 120  
665 (2):539–552, August 2018. ISSN 0022-3077, 1522-1598. doi: 10.1152/jn.00262.2017. URL <https://www.physiology.org/doi/10.1152/jn.00262.2017>.
- 667 [44] Mingli Wang, Yujie Hou, Loïc Magrou, Joonas A. Autio, Pierre Misery, Tim Coalson, Erin Reid, Yuanfang Xu, Camille  
668 Lamy, Arnauld Falchier, Qi Zhang, Mu-Ming Poo, Colette Dehay, Matthew F. Glasser, Takuya Hayashi, Kenneth  
669 Knoblauch, David Van Essen, Zhiming Shen, and Henry Kennedy. Retinotopic organization of feedback projections  
670 in primate early visual cortex: implications for active vision. *bioRxiv*, 2022. doi: 10.1101/2022.04.27.489651. URL  
671 <http://biorxiv.org/lookup/doi/10.1101/2022.04.27.489651>.
- 672 [45] Julien Vezoli, Martin Vinck, Conrado Arturo Bosman, André Moraes Bastos, Christopher Murphy Lewis, Henry  
673 Kennedy, and Pascal Fries. Brain rhythms define distinct interaction networks with differential dependence on  
674 anatomy. *Neuron*, 109(23):3862–3878.e5, December 2021. ISSN 08966273. doi: 10.1016/j.neuron.2021.09.052. URL  
675 <https://linkinghub.elsevier.com/retrieve/pii/S089662732100725X>.
- 676 [46] Carsen Stringer, Marius Pachitariu, Nicholas Steinmetz, Charu Bai Reddy, Matteo Carandini, and Kenneth D. Harris.  
677 Spontaneous behaviors drive multidimensional, brainwide activity. *Science*, 364(6437):eaav7893, 2019. ISSN 0036-8075,  
678 1095-9203. doi: 10.1126/science.aav7893.
- 679 [47] Bharath C. Talluri, Incheol Kang, Adam Lazere, Katrina R. Quinn, Nicholas Kaliss, Jacob L. Yates, Daniel A. Butts,  
680 and Hendrikje Nienborg. Activity in primate visual cortex is minimally driven by spontaneous movements. *bioRxiv*,  
681 2022. doi: 10.1101/2022.09.08.507006.
- 682 [48] Paulina Anna Dabrowska, Nicole Voges, Michael von Papen, Junji Ito, David Dahmen, Alexa Riehle, Thomas Brochier,  
683 and Sonja Grün. On the Complexity of Resting State Spiking Activity in Monkey Motor Cortex. *Cerebral Cortex  
684 Communications*, 2(3):tgab033, 2021. ISSN 2632-7376. doi: 10.1093/texcom/tgab033. URL <https://academic.oup.com/cercorcomms/article/doi/10.1093/texcom/tgab033/6277047>.
- 686 [49] Diego Mendoza-Halliday, Alex J. Major, Noah Lee, Maxwell Lichtenfeld, Brock Carlson, Blake Mitchell, Patrick D.  
687 Meng, Yihan (Sophy) Xiong, Jacob A. Westerberg, Alexander Maier, Robert Desimone, Earl K. Miller, and André M.  
688 Bastos. A ubiquitous spectrolaminar motif of local field potential power across the primate cortex. *bioRxiv*, October  
689 2022. doi: 10.1101/2022.09.30.510398. URL <http://biorxiv.org/lookup/doi/10.1101/2022.09.30.510398>.
- 690 [50] João D. Semedo, Anna I. Jasper, Amin Zandvakili, Aravind Krishna, Amir Aschner, Christian K. Machens, Adam Kohn,  
691 and Byron M. Yu. Feedforward and feedback interactions between visual cortical areas use different population activity  
692 patterns. *Nature Communications*, 13(1):1099, December 2022. ISSN 2041-1723. doi: 10.1038/s41467-022-28552-w.  
693 URL <https://www.nature.com/articles/s41467-022-28552-w>.
- 694 [51] Nikola T. Markov, Julien Vezoli, Pascal Chameau, Arnaud Falchier, René Quilodran, Cyril Huissoud, Camille  
695 Lamy, Pierre Misery, Pascale Giroud, Shimon Ullman, Pascal Barone, Colette Dehay, Kenneth Knoblauch, and  
696 Henry Kennedy. Anatomy of hierarchy: Feedforward and feedback pathways in macaque visual cortex. *Journal of  
697 Comparative Neurology*, 522(1):225–259, 2014. ISSN 00219967. doi: 10.1002/cne.23458.
- 698 [52] Stephen G. Lomber, Bertram R. Payne, and James A. Horel. The cryoloop: an adaptable reversible cooling deactivation  
699 method for behavioral or electrophysiological assessment of neural function. *Journal of Neuroscience Methods*, 86  
700 (2):179–194, 1999. ISSN 01650270. doi: 10.1016/S0165-0270(98)00165-4. URL <https://linkinghub.elsevier.com/retrieve/pii/S0165027098001654>.
- 702 [53] J. J. Nassi, S. G. Lomber, and R. T. Born. Corticocortical Feedback Contributes to Surround Suppression in V1  
703 of the Alert Primate. *Journal of Neuroscience*, 33(19):8504–8517, May 2013. ISSN 0270-6474, 1529-2401. doi:  
704 10.1523/JNEUROSCI.5124-12.2013.
- 705 [54] E. C. Dias, M. Kiesau, and M. A. Segraves. Acute activation and inactivation of macaque frontal eye field with  
706 GABA-related drugs. *Journal of Neurophysiology*, 74(6):2744–2748, December 1995. ISSN 0022-3077, 1522-1598. doi:  
707 10.1152/jn.1995.74.6.2744. URL <https://www.physiology.org/doi/10.1152/jn.1995.74.6.2744>.
- 708 [55] Thomas Brochier, Marie-Josée Boudreau, Michel Paré, and A. M. Smith. The effects of muscimol inactivation of  
709 small regions of motor and somatosensory cortex on independent finger movements and force control in the precision  
710 grip. *Experimental Brain Research*, 128(1-2):31–40, September 1999. ISSN 00144819. doi: 10.1007/s002210050814.  
711 URL <http://link.springer.com/10.1007/s002210050814>.
- 712 [56] Longtang L Chen, Laurent Goffart, and David L Sparks. A simple method for constructing microinjectrodes for  
713 reversible inactivation in behaving monkeys. *Journal of Neuroscience Methods*, 107(1-2):81–85, May 2001. ISSN  
714 01650270. doi: 10.1016/S0165-0270(01)00354-5.
- 715 [57] Samantha R. Debes and Valentin Dragoi. Suppressing feedback signals to visual cortex abolishes attentional modulation.  
716 *Science*, 379(6631):468–473, 2023. ISSN 0036-8075, 1095-9203. doi: 10.1126/science.ade1855.



- 717 [58] Nicolas Brunel. Dynamics of Sparsely Connected Networks of Excitatory and Inhibitory Spiking Neurons. *Journal*  
718 *of Computational Neuroscience*, 8(3):183–208, 2000. ISSN 09295313. doi: 10.1023/A:1008925309027. URL [http://](http://link.springer.com/10.1023/A:1008925309027)  
719 [link.springer.com/10.1023/A:1008925309027](http://link.springer.com/10.1023/A:1008925309027).
- 720 [59] Brent Doiron, Ashok Litwin-Kumar, Robert Rosenbaum, Gabriel K Ocker, and Krešimir Josić. The mechanics of  
721 state-dependent neural correlations. *Nature Neuroscience*, 19(3):383–393, 2016. ISSN 1097-6256, 1546-1726. doi:  
722 10.1038/nn.4242. URL <http://www.nature.com/articles/nn.4242>.
- 723 [60] Tom Tetzlaff, Moritz Helias, Gaute T. Einevoll, and Markus Diesmann. Decorrelation of Neural-Network Activity by  
724 Inhibitory Feedback. *PLoS Computational Biology*, 8(8):e1002596, 2012. ISSN 1553-7358. doi: 10.1371/journal.pcbi.  
725 1002596. URL <https://dx.plos.org/10.1371/journal.pcbi.1002596>.
- 726 [61] Michael T. Schaub, Yazan N. Billeh, Costas A. Anastassiou, Christof Koch, and Mauricio Barahona. Emergence of  
727 Slow-Switching Assemblies in Structured Neuronal Networks. *PLOS Computational Biology*, 11(7):e1004196, 2015.  
728 ISSN 1553-7358. doi: 10.1371/journal.pcbi.1004196. URL <https://dx.plos.org/10.1371/journal.pcbi.1004196>.
- 729 [62] Vahid Rostami, Thomas Rost, Alexa Riehle, Sacha J. Van Albada, and Martin P. Nawrot. Excitatory and inhibitory  
730 motor cortical clusters account for balance, variability, and task performance. preprint, Neuroscience, 2020. URL  
731 <http://biorxiv.org/lookup/doi/10.1101/2020.02.27.968339>.
- 732 [63] Anouk M. Van Loon, Johannes J. Fahrenfort, Bauke Van Der Velde, Philipp B. Lirk, Nienke C. C. Vulink, Markus W.  
733 Hollmann, H. Steven Scholte, and Victor A. F. Lamme. NMDA Receptor Antagonist Ketamine Distorts Object  
734 Recognition by Reducing Feedback to Early Visual Cortex. *Cerebral Cortex*, 26(5):1986–1996, May 2016. ISSN  
735 1047-3211, 1460-2199. doi: 10.1093/cercor/bhv018. URL [https://academic.oup.com/cercor/article-lookup/doi/](https://academic.oup.com/cercor/article-lookup/doi/10.1093/cercor/bhv018)  
736 [10.1093/cercor/bhv018](https://academic.oup.com/cercor/article-lookup/doi/10.1093/cercor/bhv018).
- 737 [64] Jose L. Herrero, Marc A. Gieselmann, Mehdi Sanayei, and Alexander Thiele. Attention-Induced Variance and  
738 Noise Correlation Reduction in Macaque V1 Is Mediated by NMDA Receptors. *Neuron*, 78(4):729–739, May  
739 2013. ISSN 08966273. doi: 10.1016/j.neuron.2013.03.029. URL [https://linkinghub.elsevier.com/retrieve/pii/](https://linkinghub.elsevier.com/retrieve/pii/S0896627313002766)  
740 [S0896627313002766](https://linkinghub.elsevier.com/retrieve/pii/S0896627313002766).
- 741 [65] John D. Porter, Barton L. Guthrie, and David L. Sparks. Innervation of monkey extraocular muscles: Localization  
742 of sensory and motor neurons by retrograde transport of horseradish peroxidase. *The Journal of Comparative*  
743 *Neurology*, 218(2):208–219, August 1983. ISSN 0021-9967, 1096-9861. doi: 10.1002/cne.902180208. URL [https://](https://onlinelibrary.wiley.com/doi/10.1002/cne.902180208)  
744 [onlinelibrary.wiley.com/doi/10.1002/cne.902180208](https://onlinelibrary.wiley.com/doi/10.1002/cne.902180208).
- 745 [66] Daniela Balslev, Neil B. Albert, and Chris Miall. Eye muscle proprioception is represented bilaterally in the sensorimotor  
746 cortex. *Human Brain Mapping*, 32(4):624–631, April 2011. ISSN 1065-9471, 1097-0193. doi: 10.1002/hbm.21050.  
747 URL <https://onlinelibrary.wiley.com/doi/10.1002/hbm.21050>.
- 748 [67] N. T. Markov, M. M. Ercsey-Ravasz, A. R. Ribeiro Gomes, C. Lamy, L. Magrou, J. Vezoli, P. Misery, A. Falchier,  
749 R. Quilodran, M. A. Gariel, J. Sallet, R. Gamanut, C. Huissoud, S. Clavagnier, P. Giroud, D. Sappey-Mariniér,  
750 P. Barone, C. Dehay, Z. Toroczkai, K. Knoblauch, D. C. Van Essen, and H. Kennedy. A Weighted and Directed  
751 Interareal Connectivity Matrix for Macaque Cerebral Cortex. *Cerebral Cortex*, 24(1):17–36, January 2014. ISSN  
752 1460-2199, 1047-3211. doi: 10.1093/cercor/bhs270.
- 753 [68] Georgia G. Gregoriou, Stephen J. Gotts, Huihui Zhou, and Robert Desimone. High-Frequency, Long-Range Coupling  
754 Between Prefrontal and Visual Cortex During Attention. *Science*, 324(5931):1207–1210, 2009. ISSN 0036-8075,  
755 1095-9203. doi: 10.1126/science.1171402.
- 756 [69] F.H Lopes Da Silva, J.E Vos, J Mooibroek, and A Van Rotterdam. Relative contributions of intracortical and thalamo-  
757 cortical processes in the generation of alpha rhythms, revealed by partial coherence analysis. *Electroencephalography*  
758 *and Clinical Neurophysiology*, 50(5-6):449–456, 1980. ISSN 00134694. doi: 10.1016/0013-4694(80)90011-5. URL  
759 <https://linkinghub.elsevier.com/retrieve/pii/0013469480900115>.
- 760 [70] Barna Zajzon and Aitor Morales-Gregorio. Trans-thalamic Pathways: Strong Candidates for Supporting Communi-  
761 cation between Functionally Distinct Cortical Areas. *The Journal of Neuroscience*, 39(36):7034–7036, 2019. ISSN  
762 0270-6474, 1529-2401. doi: 10.1523/JNEUROSCI.0656-19.2019.
- 763 [71] Simon Hanslmayr, Wolfgang Klimesch, Paul Sauseng, Walter Gruber, Michael Doppelmayr, Roman Freunberger,  
764 and Thomas Pecherstorfer. Visual discrimination performance is related to decreased alpha amplitude but increased  
765 phase locking. *Neuroscience Letters*, 375(1):64–68, 2005. ISSN 03043940. doi: 10.1016/j.neulet.2004.10.092. URL  
766 <https://linkinghub.elsevier.com/retrieve/pii/S030439400401359X>.
- 767 [72] Pierre Yger, Giulia LB Spampinato, Elric Esposito, Baptiste Lefebvre, Stéphane Deny, Christophe Gardella, Marcel  
768 Stimberg, Florian Jetter, Guenther Zeck, Serge Picaud, Jens Duebel, and Olivier Marre. A spike sorting toolbox  
769 for up to thousands of electrodes validated with ground truth recordings in vitro and in vivo. *eLife*, 7:e34518, 2018.  
770 ISSN 2050-084X. doi: 10.7554/eLife.34518. URL <https://elifesciences.org/articles/34518>.

- 771 [73] Joshua B. Tenenbaum, Vin de Silva, and John C. Langford. A Global Geometric Framework for Nonlinear  
772 Dimensionality Reduction. *Science*, 290(5500):2319–2323, December 2000. ISSN 0036-8075, 1095-9203. doi:  
773 10.1126/science.290.5500.2319. URL <https://www.science.org/doi/10.1126/science.290.5500.2319>.
- 774 [74] Mukeshwar Dhamala, Govindan Rangarajan, and Mingzhou Ding. Estimating Granger Causality from Fourier and  
775 Wavelet Transforms of Time Series Data. *Physical Review Letters*, 100(1):018701, 2008. ISSN 0031-9007, 1079-7114.  
776 doi: 10.1103/PhysRevLett.100.018701. URL <https://link.aps.org/doi/10.1103/PhysRevLett.100.018701>.
- 777 [75] G. Tunncliffe Wilson. The Factorization of Matricial Spectral Densities. *SIAM Journal on Applied Mathematics*, 23  
778 (4):420–426, 1972. ISSN 0036-1399, 1095-712X. doi: 10.1137/0123044. URL [http://epubs.siam.org/doi/10.1137/](http://epubs.siam.org/doi/10.1137/0123044)  
779 [0123044](http://epubs.siam.org/doi/10.1137/0123044).
- 780 [76] Michael Denker, Cristiano Köhler, Aitor Morales-Gregorio, Alexander Kleinjohann, Peter Bouss, Alessandra Stella,  
781 Regimantas Jurkus, Maximilian Kramer, Paulina Dabrowska, Moritz Kern, Anno Christopher Kurth, Robin Gutzen,  
782 Florian Pormann, and Sarah Pilz. Elephant 0.11.1, April 2022. URL <https://zenodo.org/record/6470226>.
- 783 [77] P. Du, W. A. Kibbe, and S. M. Lin. Improved peak detection in mass spectrum by incorporating continuous wavelet  
784 transform-based pattern matching. *Bioinformatics*, 22(17):2059–2065, September 2006. ISSN 1367-4803, 1460-2059.  
785 doi: 10.1093/bioinformatics/btl355.
- 786 [78] Sebastian Spreizer, Jessica Mitchell, Jakob Jordan, Willem Wybo, Anno Kurth, Stine Brekke Vennemo, Jari Pronold,  
787 Guido Trenschi, Mohamed Ayssar Benelhedi, Dennis Terhorst, Jochen Martin Eppler, Håkon Mørk, Charl Linssen,  
788 Johanna Senk, Melissa Lober, Abigail Morrison, Steffen Graber, Susanne Kunkel, Robin Gutzen, and Hans Ekkehard  
789 Plessner. NEST 3.3, 2022. URL <https://zenodo.org/record/6368023>.

## Extended data figures

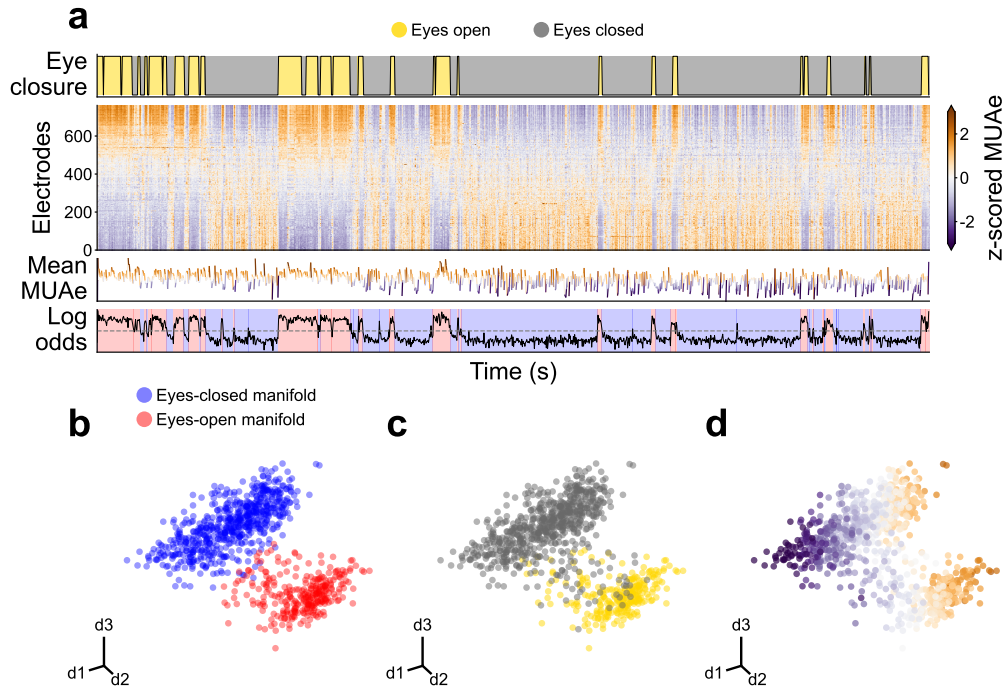

Figure S1: Overview of the experimental data from session L\_RS\_090817. **a** Time evolution of signals. **b, c, d** First three principal components of the MUAe neural manifold.

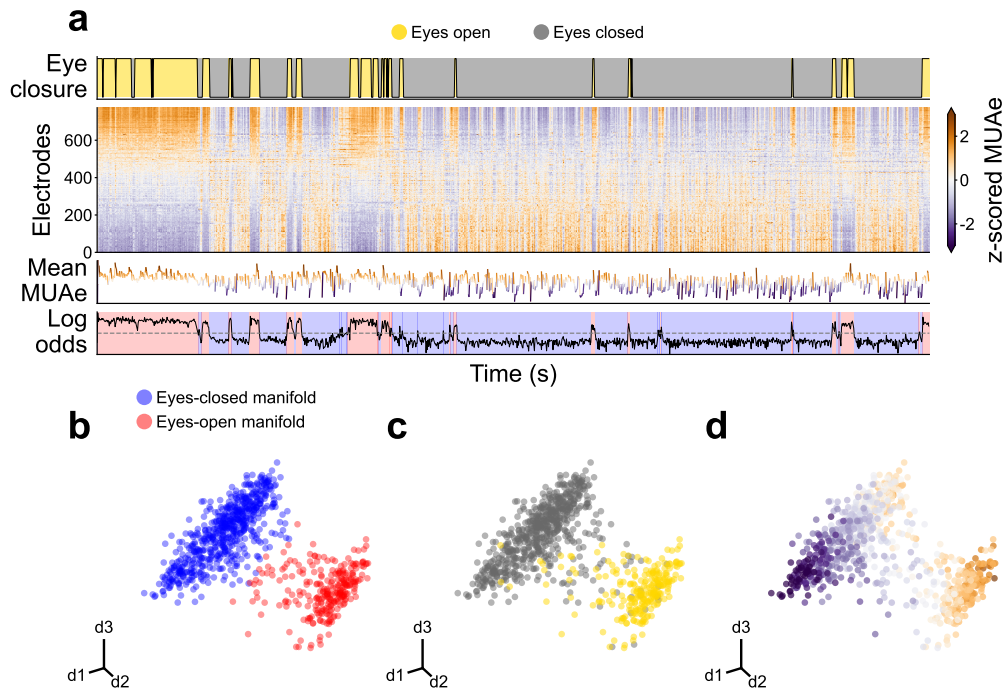

Figure S2: Overview of the experimental data from session L\_RS\_100817. **a** Time evolution of signals. **b, c, d** First three principal components of the MUAe neural manifold.

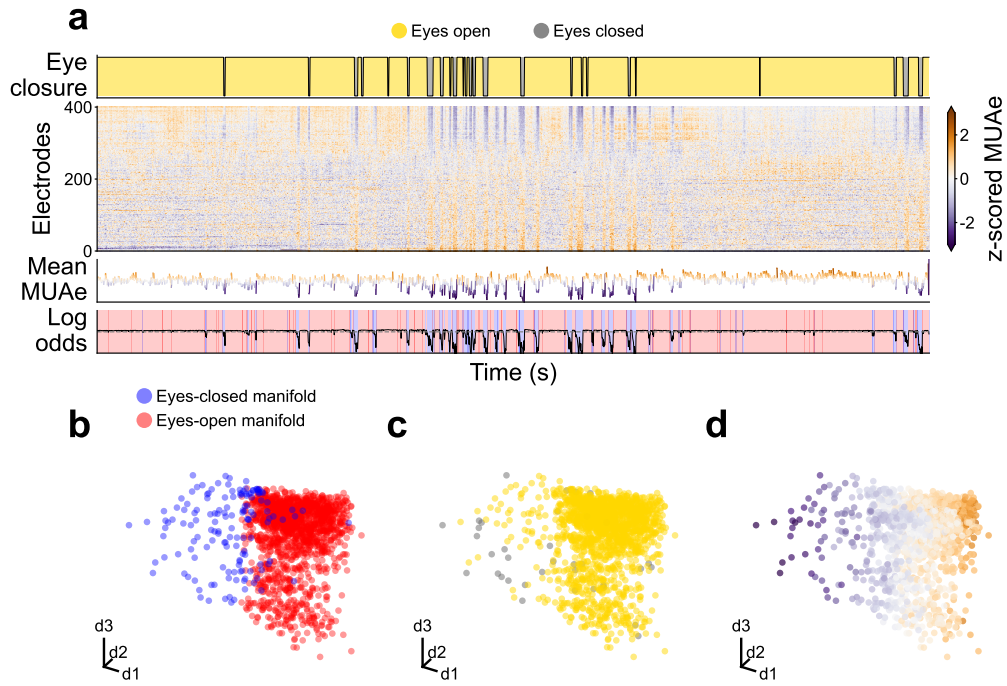

Figure S3: Overview of the experimental data from session A\_RS\_150819. **a** Time evolution of signals. **b, c, d** First three principal components of the MUAe neural manifold.

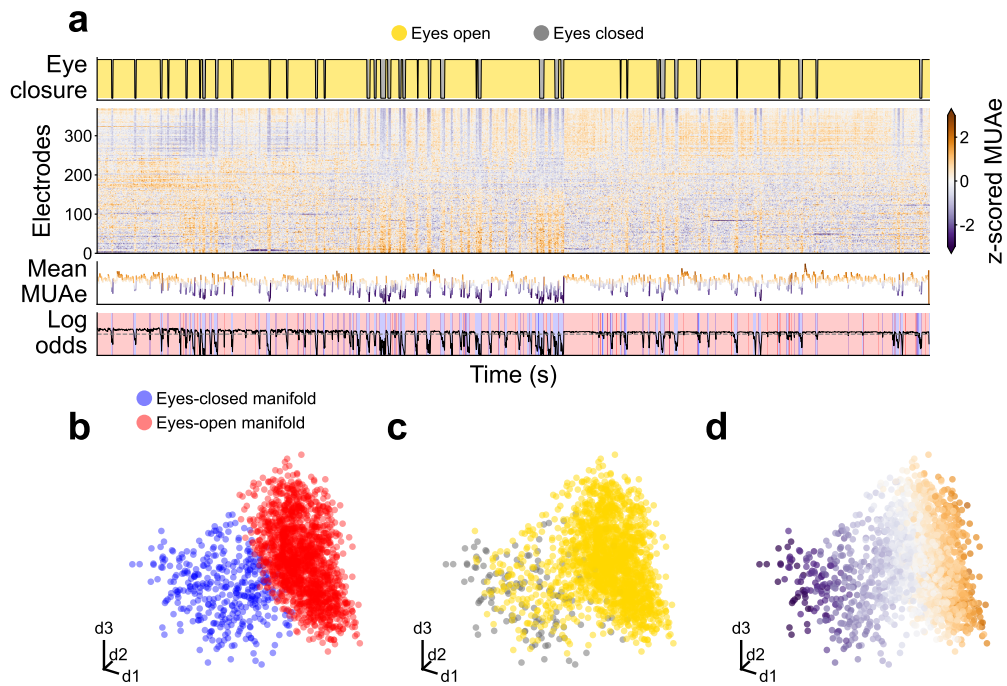

Figure S4: Overview of the experimental data from session A\_RS\_160819. **a** Time evolution of signals. **b, c, d** First three principal components of the MUAe neural manifold.

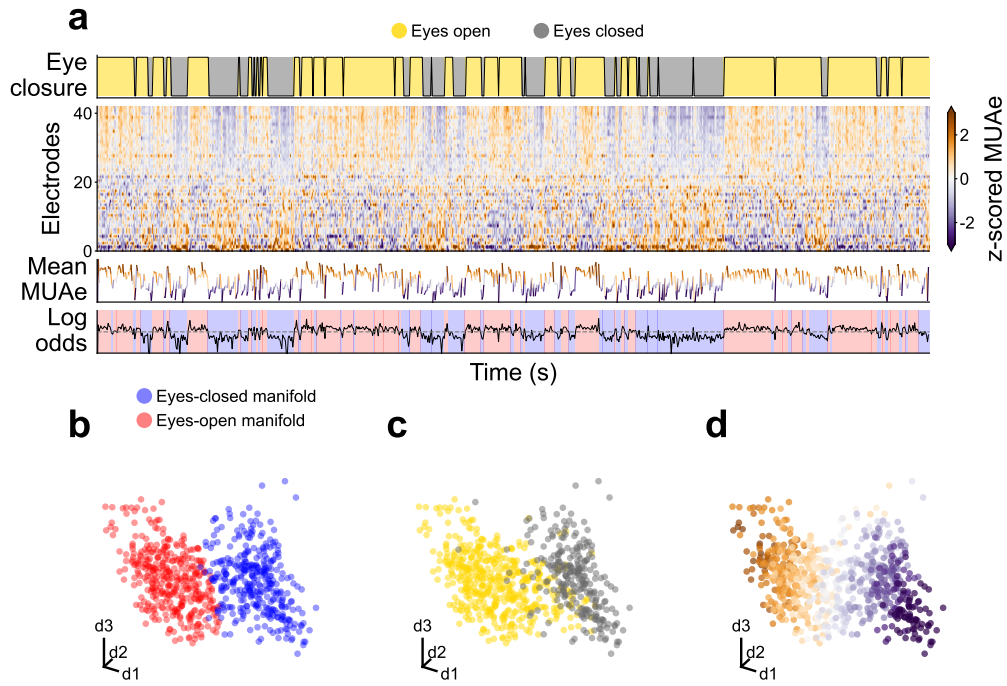

Figure S5: Overview of the experimental data from session Y\_RS\_180122. **a** Time evolution of signals. **b, c, d** First three principal components of the MUAe neural manifold.

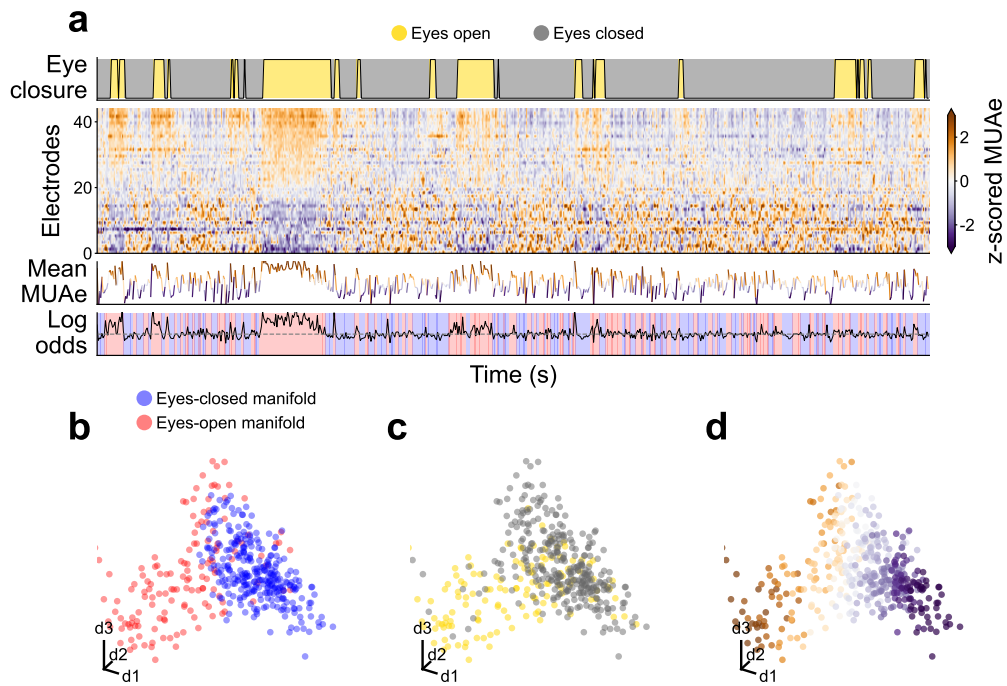

Figure S6: Overview of the experimental data from session Y\_RS\_180122. **a** Time evolution of signals. **b, c, d** First three principal components of the MUAe neural manifold.

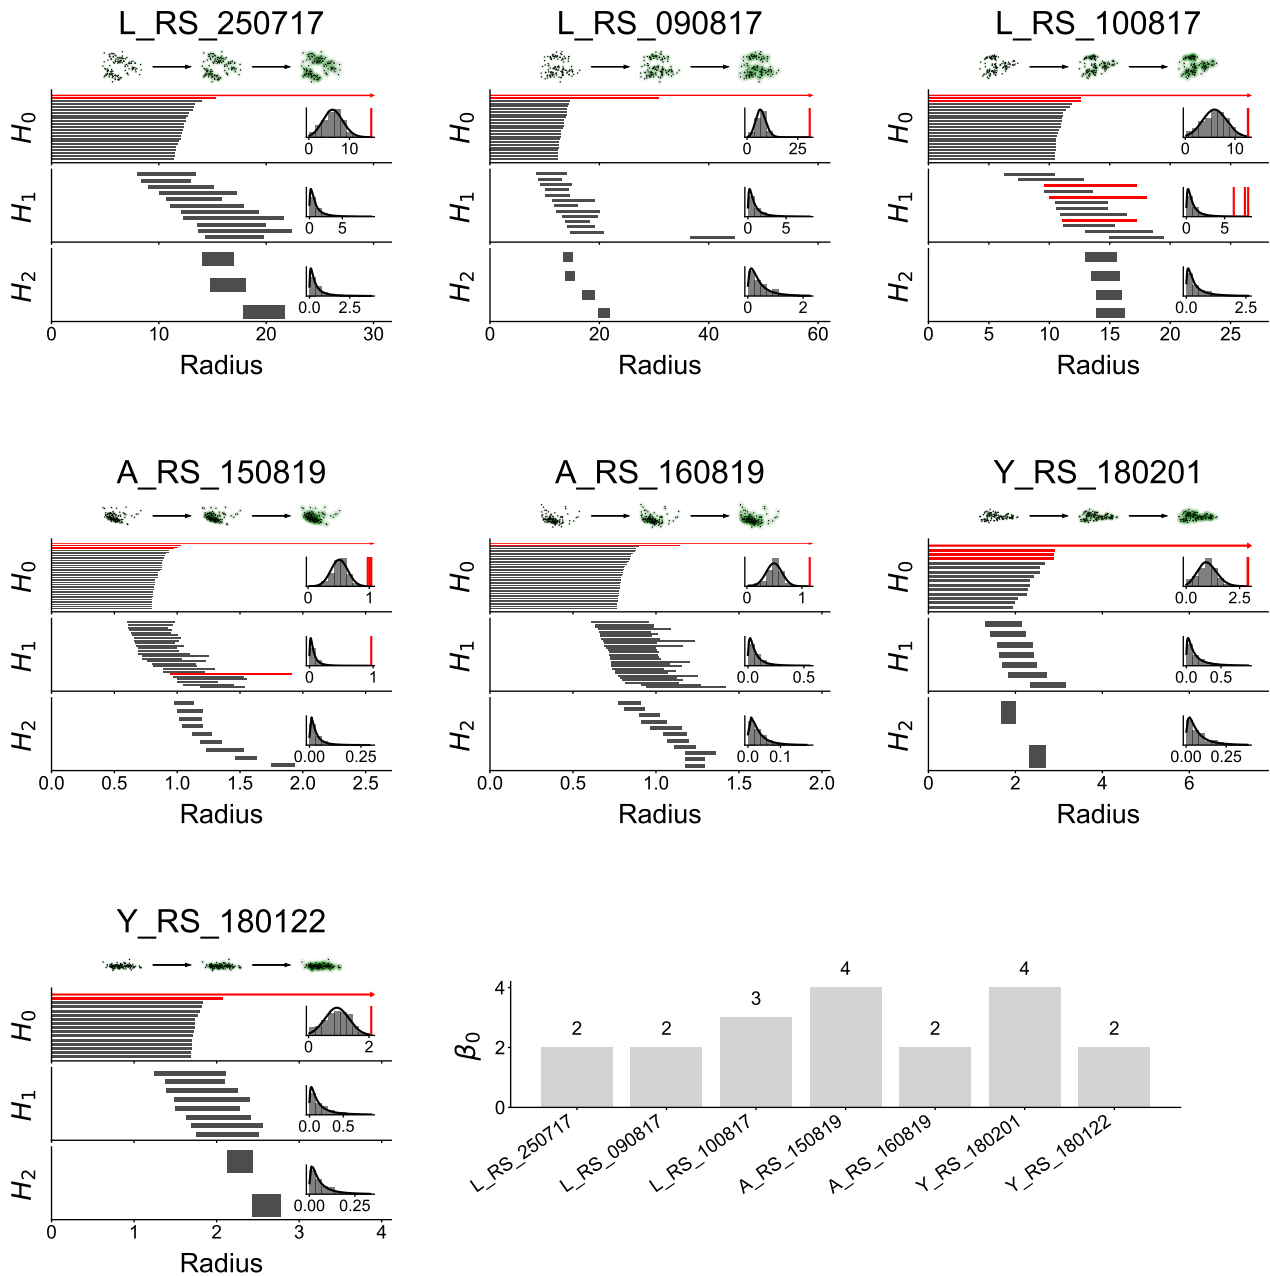

Figure S7: Persistence homology of the high-dimensional manifolds show the presence of at least two clusters. Each panel shows data for one session. For each panel, (Top) Sample clouds with a green radius around them. These correspond to the radius used in the persistent homology process. (Main plots) Persistence barcodes of the Vietoris-Rips complex of the 10D neural manifolds, for all sessions. (Inset plots) Distribution of barcode length with a fitted lognormal distribution, long barcodes coloured red (determined ad hoc). (Bottom right panel) Number of clusters found in each session.

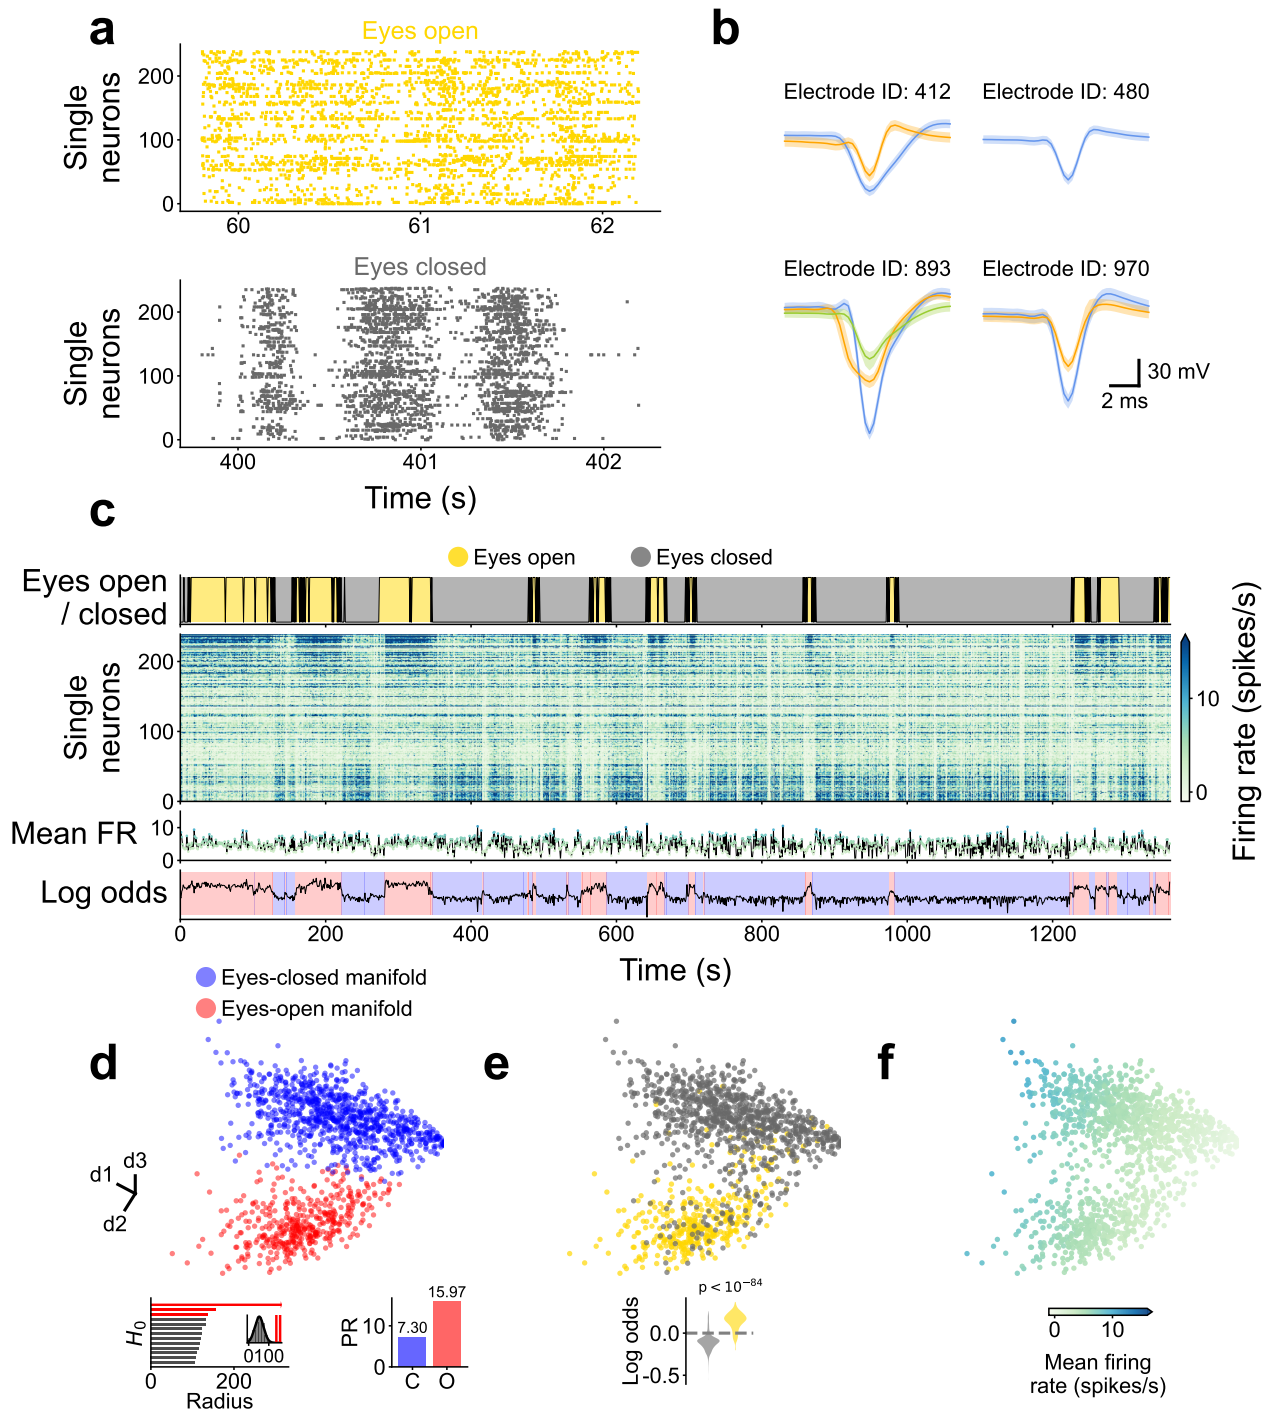

Figure S8: Overview of the spiking data from session L\_RS.250717. Single neurons were isolated using a semi-automatic spike sorting method, see Methods, [Spike sorting](#). The firing rate (FR) was calculated counting the number of spikes in 1-second bins. **a** Sample spike raster plots for eyes-open and eyes-closed periods. **b** Sample waveforms from four electrodes, multiple single units isolated in some electrodes (colour-coded). Median (solid line) and 20-80 percentiles (shading) shown per unit. **c** Time evolution of signals. **d**, **e**, **f** First three principal components of the FR. Insets show the persistent homology for the  $H_0$  homology group (**d**), the Participation Ratio (PR) of each manifold that are in agreement with the MUAe measurements (**d**) and the violin plots of the eye closure against the clustering log odds (**e**).

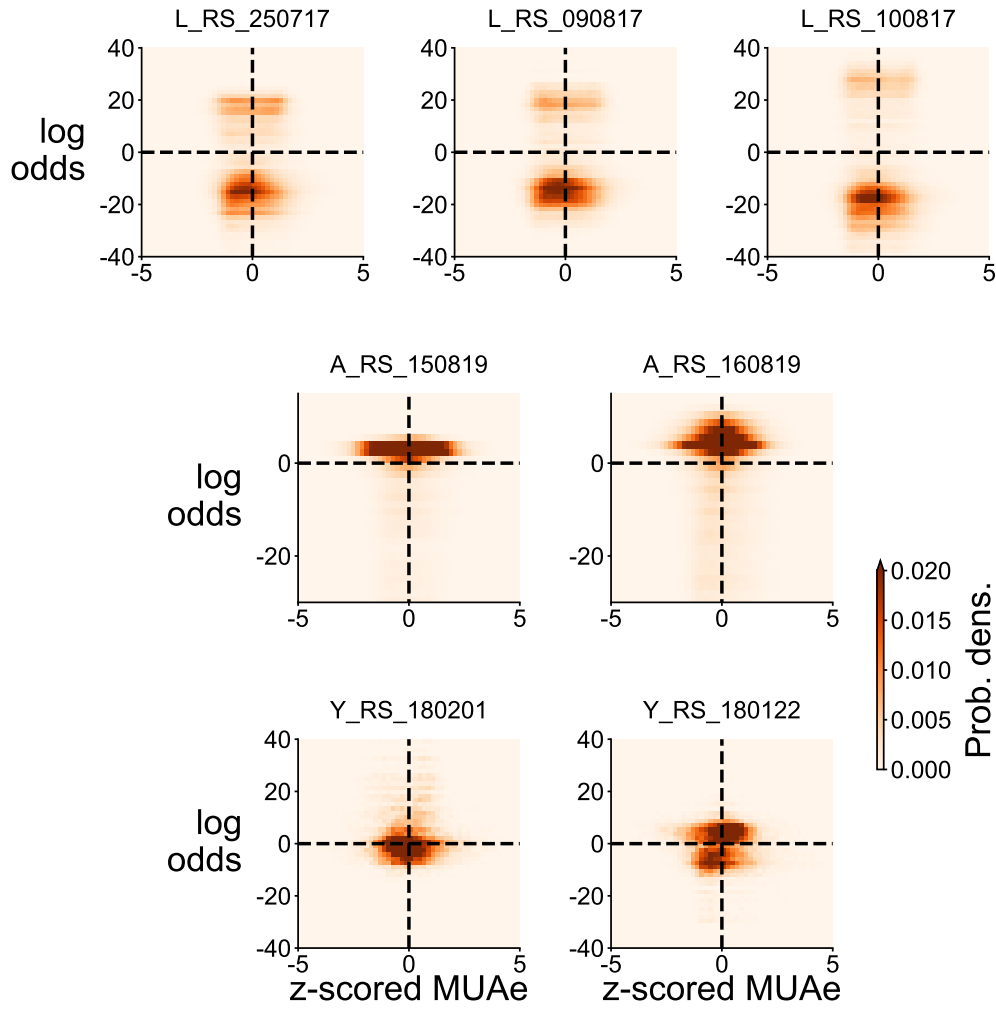

Figure S9: 2D histograms of z-scored MUAe and log odds. Darker colour indicates higher occurrence. If the neural manifolds were solely explained by the higher activity, the histograms should be strictly diagonal; we instead observe that the histograms spread across multiple quadrants and are even bimodal in some cases.



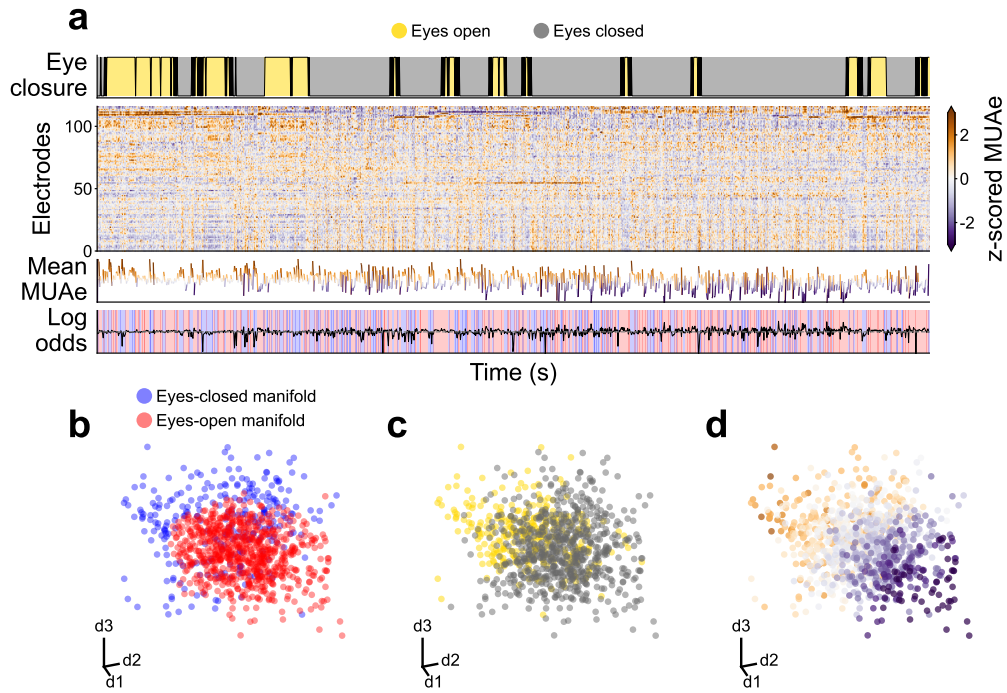

Figure S10: V4 activity from session L\_RS\_250717 does not show distinct clusters in its neural manifold. **a** Time evolution of signals. **b**, **c**, **d** Three dimensional PCA of the MUAe neural manifold.

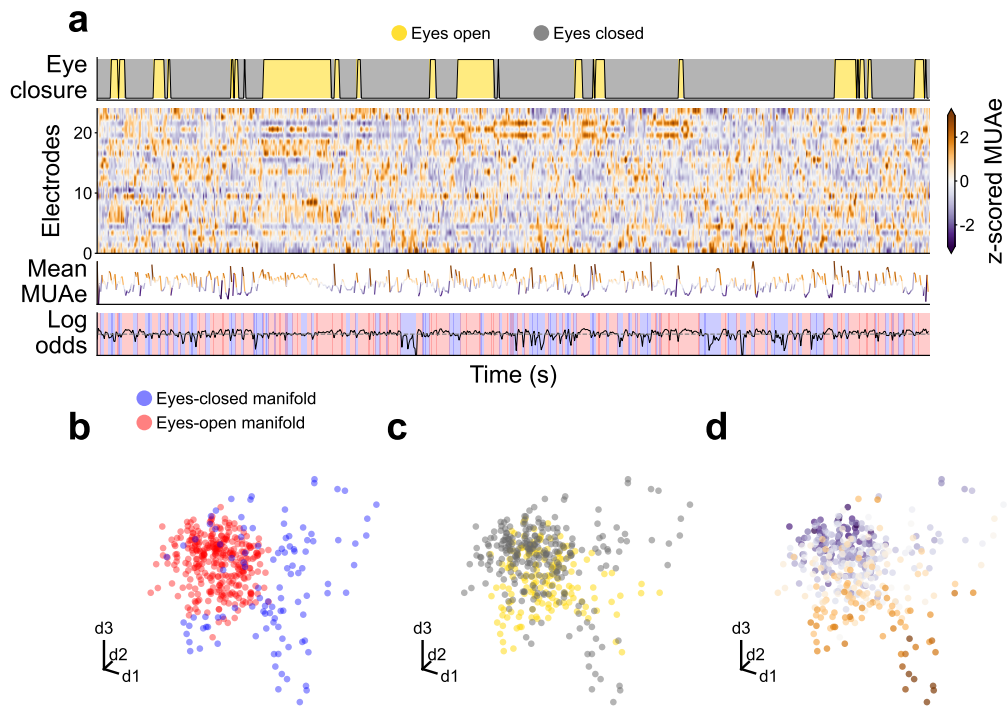

Figure S11: DP activity from session Y\_RS\_180201 does not show distinct clusters in its neural manifold. **a** Time evolution of signals. **b**, **c**, **d** Three dimensional PCA of the MUAe neural manifold.

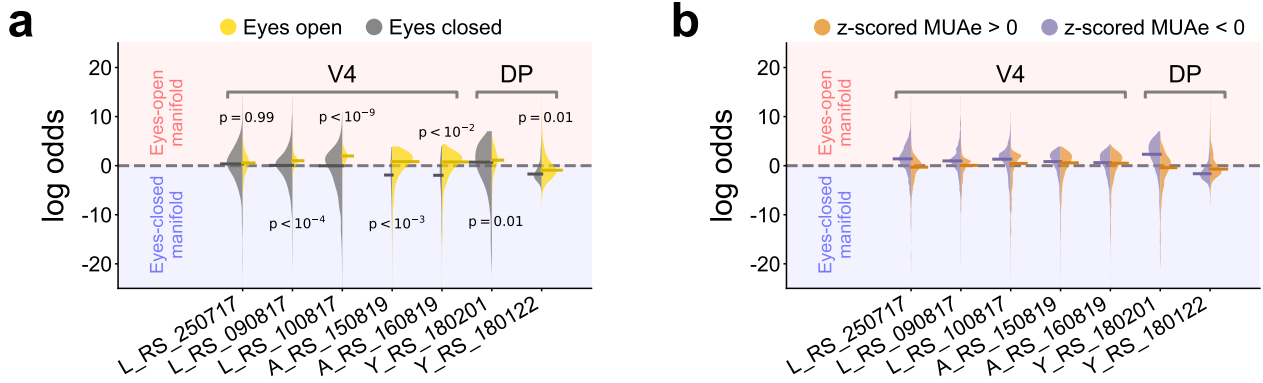

Figure S12: V4 and DP manifold log odds are not strongly correlated with eye closure nor with MUAe. **a, b** Violin plots of V4 and DP for eye closure (**a**) and MUAe activity (**b**). Neither show a clear separation along different neural manifolds.

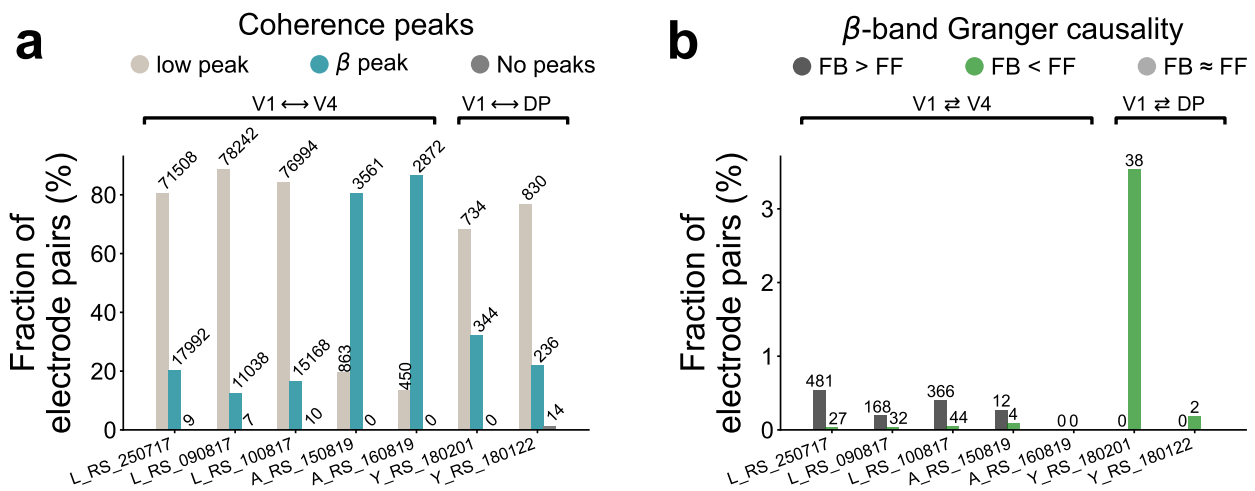

Figure S13: Quantification of coherence peaks and beta-band spectral Granger causality. **a** Quantification of coherence peaks across all sessions. A substantial portion of all electrode pairs displayed a beta peak. Note that the percentages for a session can add up to more than 100% since the same electrode pair can have both a low-frequency and a beta peak. **b** Quantification of beta-band spectral Granger causality for all sessions. Welch's t-test was used to determine whether top-down Granger causality was greater than, less than, or roughly equal to bottom-up Granger causality, within the beta frequency band. The test was only applied to those electrode pairs that showed a beta coherence peak. A large portion of  $V1 \rightleftharpoons V4$  pairs show stronger causality in the top-down direction, while  $V1 \rightleftharpoons DP$  did not appear to have prominent top-down causality compared to bottom-up causality.

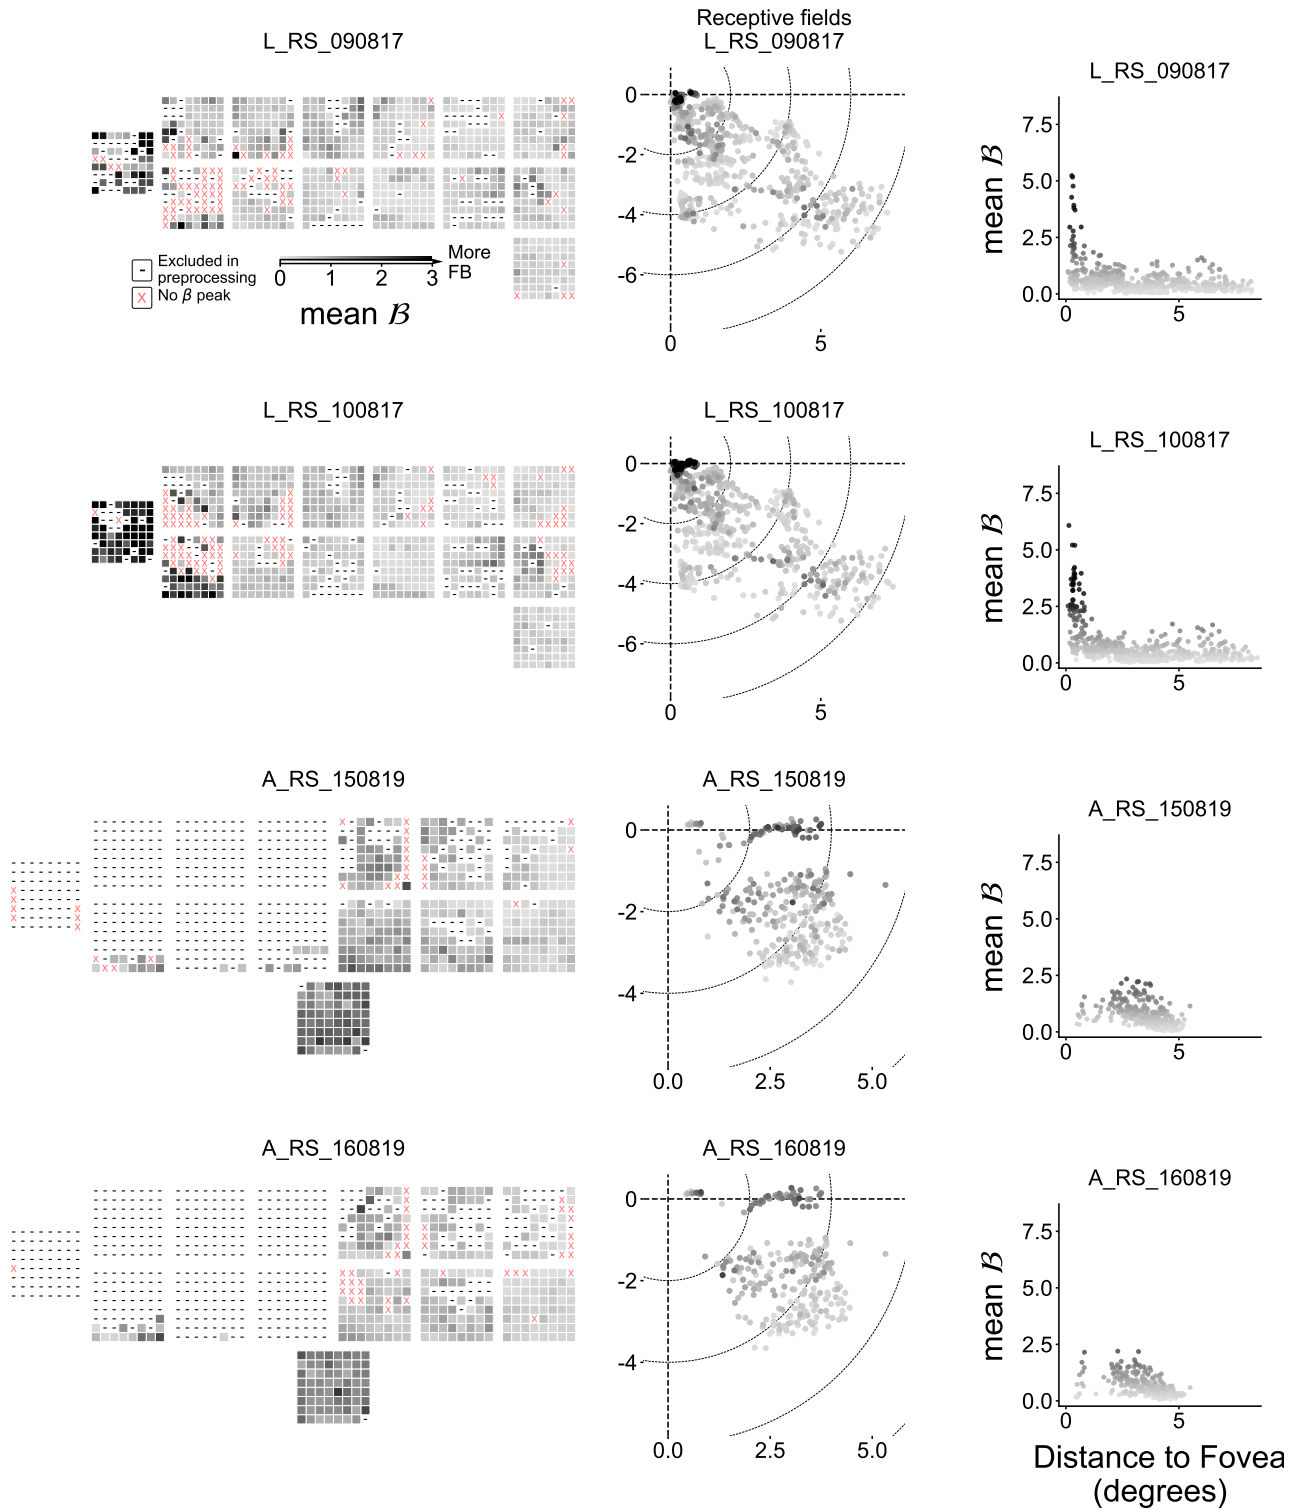

Figure S14: Spatial distribution of Granger causality strength per electrode for all relevant sessions. (*Left column*) Schematic representation of the electrode locations overlaid with the mean top-down signal strength  $\mathcal{B}$  per electrode (see [Coherence and Granger causality](#) for a description of  $\mathcal{B}$ ). (*Center column*) Receptive field (RF) map overlaid with the mean  $\mathcal{B}$  per electrode. Stronger  $\mathcal{B}$  is found around the foveal region of V1. (*Right column*) Mean  $\mathcal{B}$  displayed against the distance from the fovea.

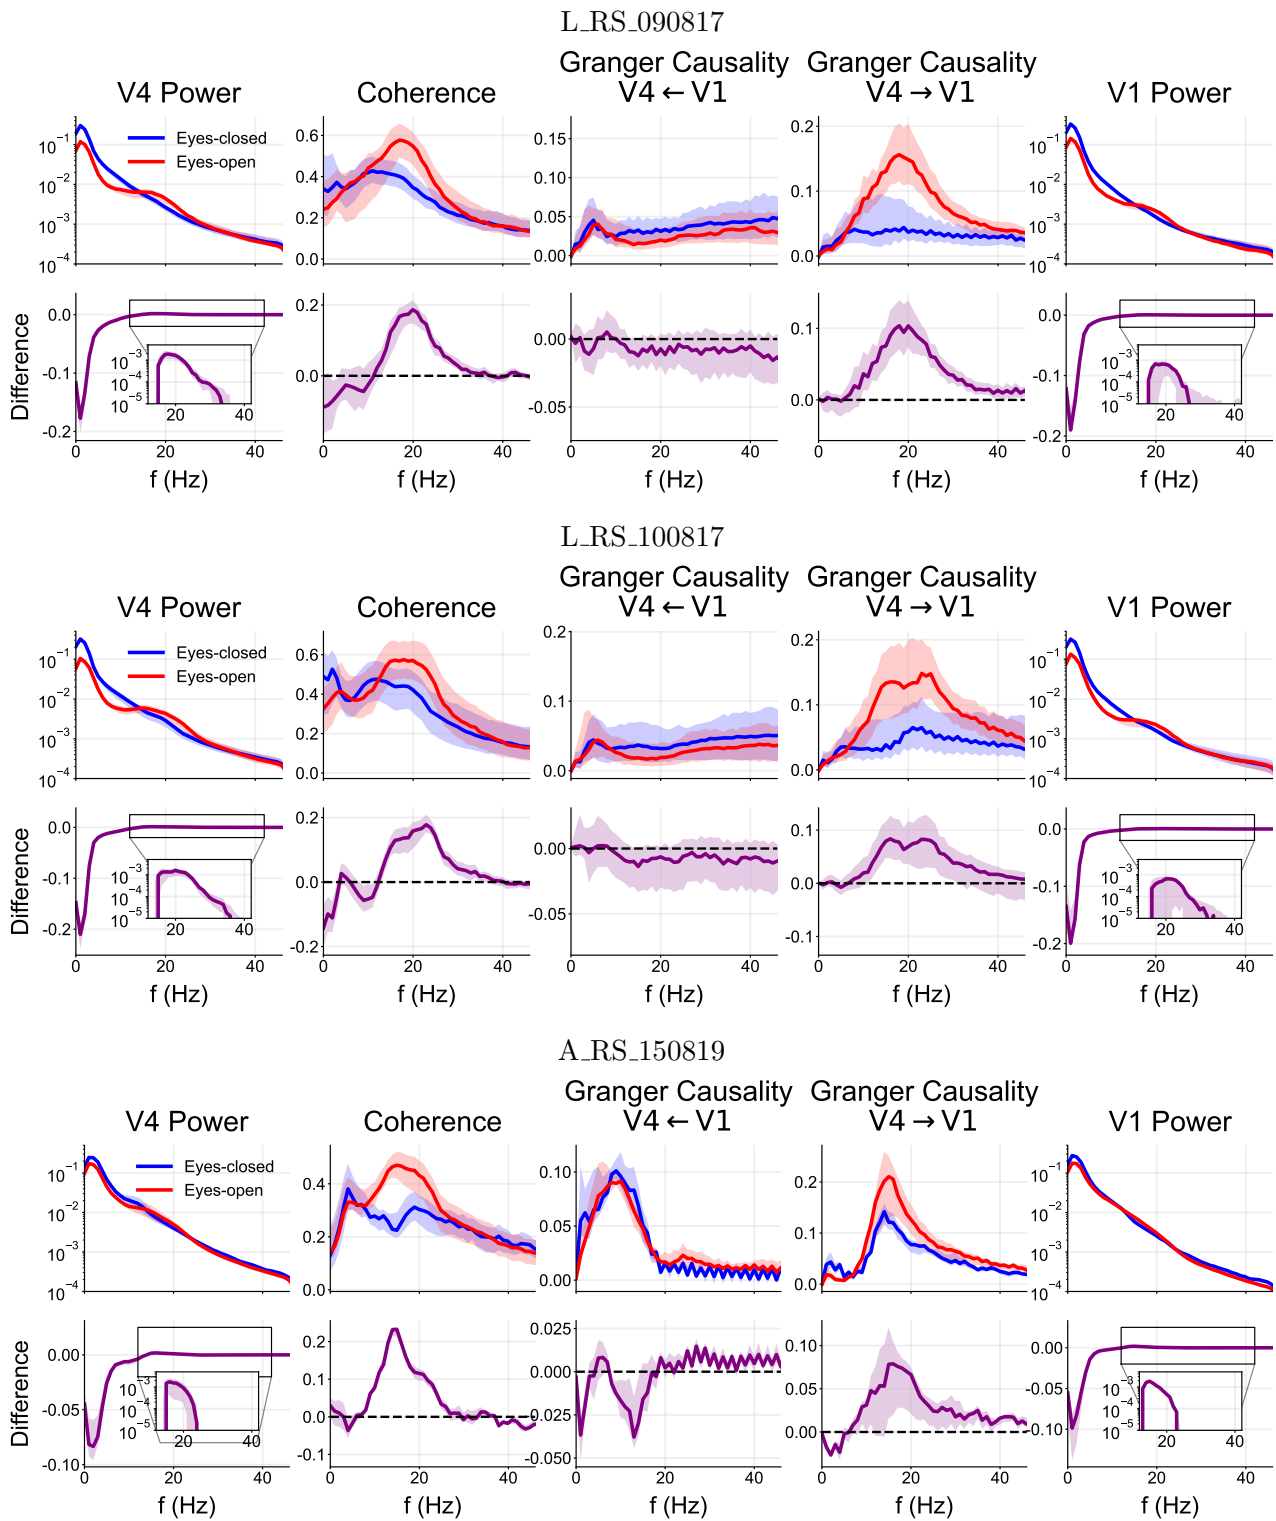

Figure S15: Spectral power, coherence, and Granger causality for the electrodes with high causality strength ( $\mathcal{B} > 10$ ) in sessions L\_RS\_090817, L\_RS\_100817, and A\_RS\_150819. The data for each behavioural condition (eyes-open/closed) were concatenated and their metrics reported separately. Thick line shows median across electrodes (or pairs of electrodes) and shading indicates the 25th to 75th percentile (top row for each session). The difference between eyes-open and eyes-closed was calculated for each electrode or pair of electrodes (bottom row for each session).

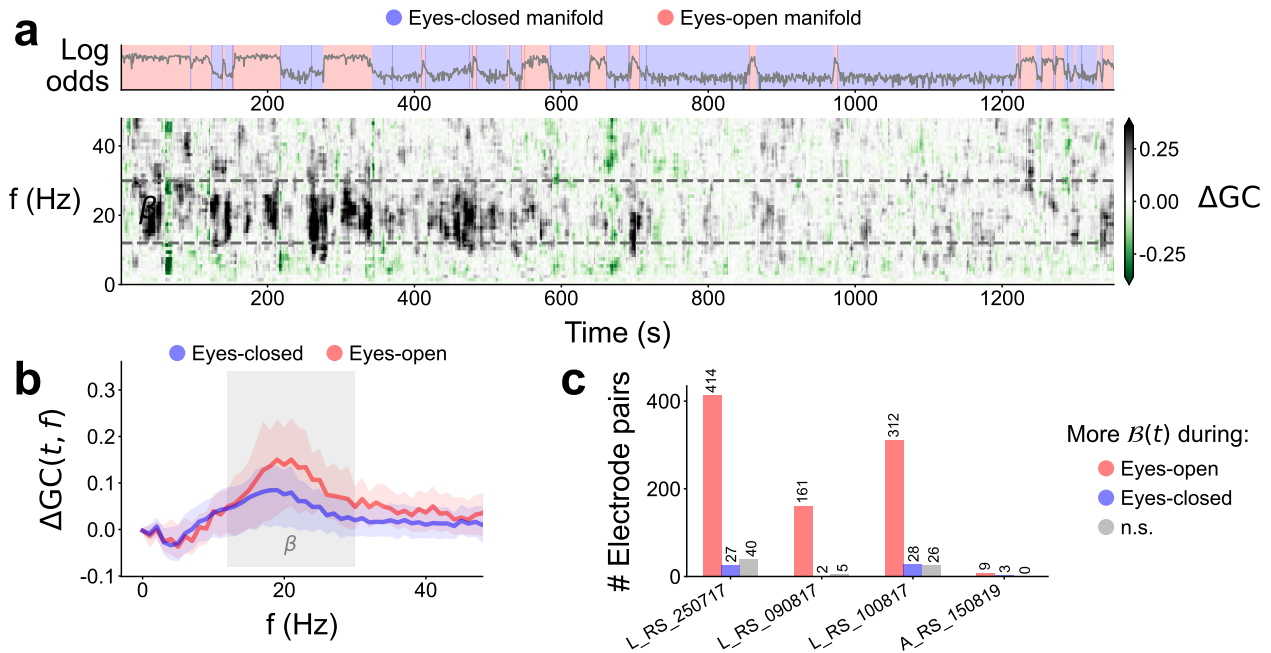

Figure S16: Time-dependent spectral Granger causality reveal higher top-down signals in the eyes-open periods. **a** Time evolution of the log odds (top), and the spectral Granger causality difference for a representative sample of V1-V4 electrodes (bottom). The sample electrodes were the same as in Figure 5a. **b** Causality difference median (line) and 25th to 75th percentiles (shade) in each manifold for one sample V1-V4 electrode pair. Beta frequency range highlighted. **c** Quantification of beta-band causality difference  $\beta(t)$  over time (in each manifold) for all V1-V4 and V1-DP electrodes in all sessions—using Welch’s t-test.

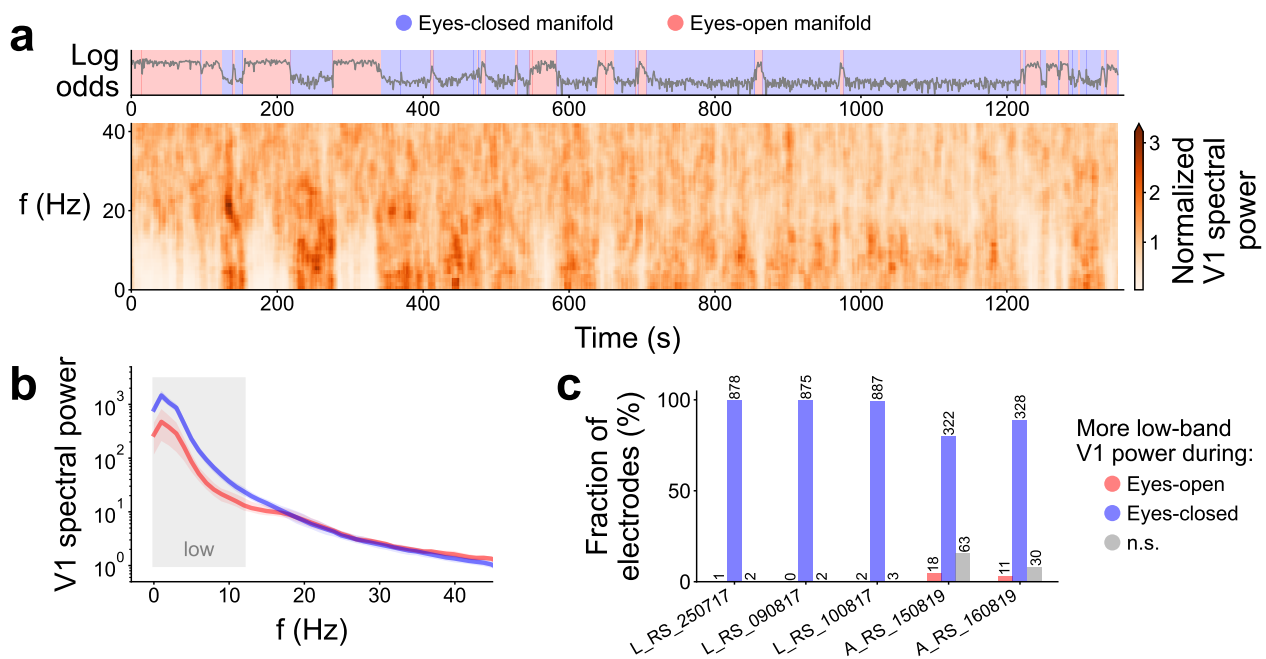

Figure S17: Analysis of the V1 LFP spectrogram. **a** Log odds identifying the neural manifolds (as in Figure 2a), and time-varying spectrum of a sample V1 electrode (session L\_RS\_250717, power normalised for each frequency). **b** Spectrum of a sample V1 electrode (session L\_RS\_250717). Colours indicate the different manifolds. **c** Result of t-test in the low frequency band (less than 12 Hz) for all V1 electrodes. As expected, the overwhelming majority of electrodes displays higher low frequency power when the eyes are closed.

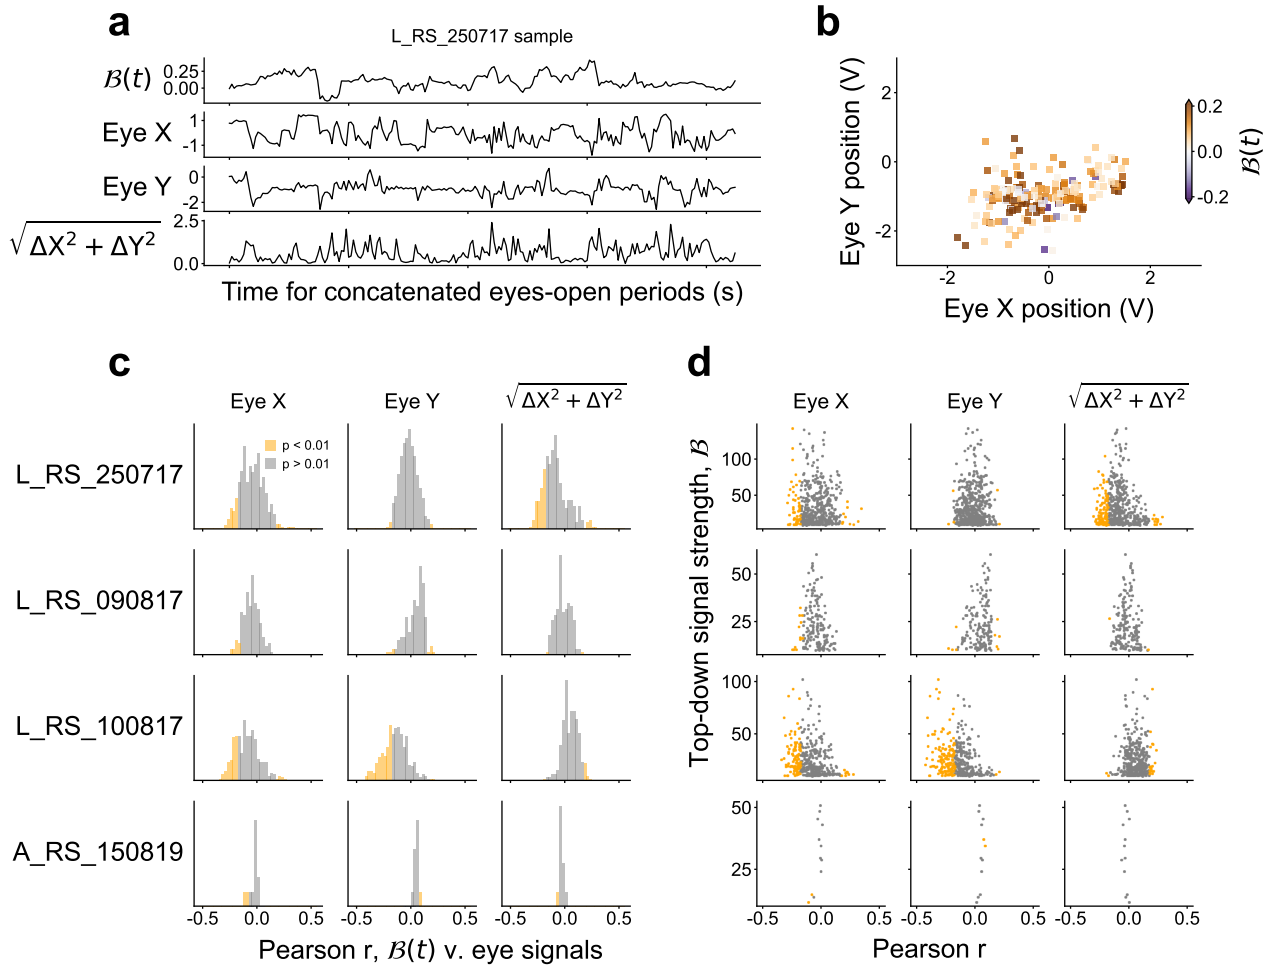

Figure S18: Top-down signals are not correlated with gaze direction. **a** Sample traces of the beta-band Granger causality difference, gaze direction (Eye X, Eye Y), and gaze movement speed ( $\sqrt{\Delta X^2 + \Delta Y^2}$ ). **b** Sample beta causality difference over the gaze locations. Higher top-down causality is not concentrated in particular regions. **c** Histograms of Pearson correlation coefficients between time-dependent causality difference and gaze signals, computed for all electrode pairs in all sessions. Significant ( $p < 0.01$  two-tailed) part of histograms shown in orange. Note that we did not correct for multiple testing, since reducing the p-value threshold would simply reinforce our finding that no strong correlation was present between the gaze and the top-down signals; i.e., no multiple testing correction was the more conservative approach in this case. **d** Scatter plot of the summed time-independent causality difference against the correlation with gaze direction and movement. There is no clear relation between  $B(t)$ -gaze correlation and causality strength.

## Eyes opening

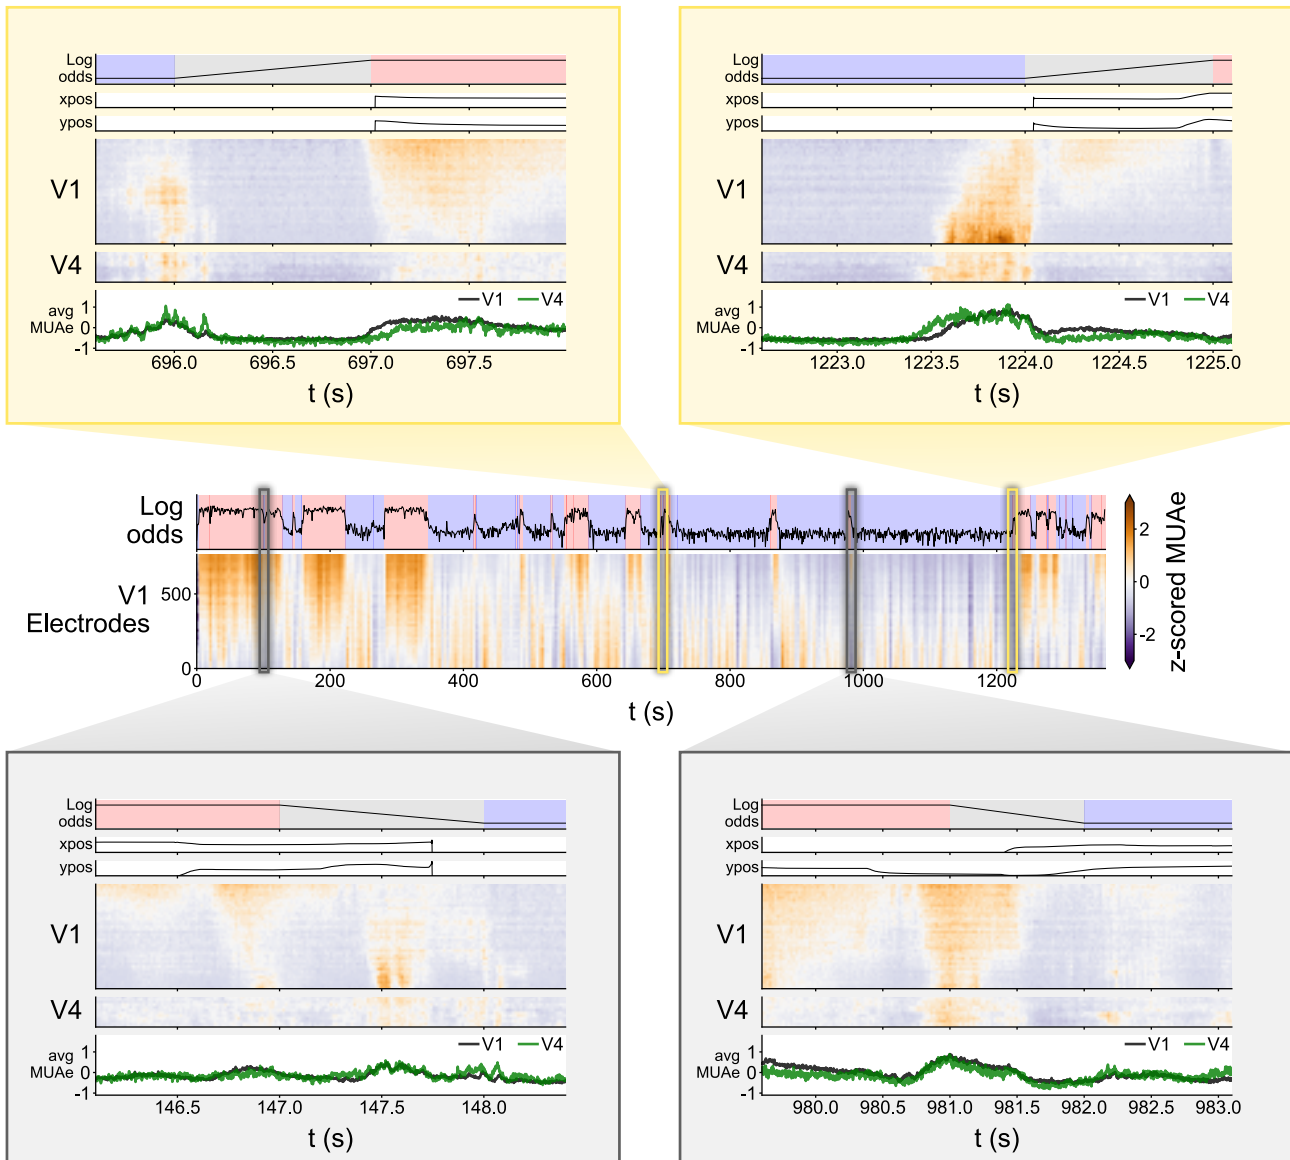

## Eyes closing

Figure S19: Closer look at the V1 and V4 MUAe around the transitions between the two manifolds in session L\_RS\_250717.
